# Supplementary material
Source: PubMed Central journal article supplement (PMC6858964)

Supplementary Figure 1

Prospective Discovery Cohort

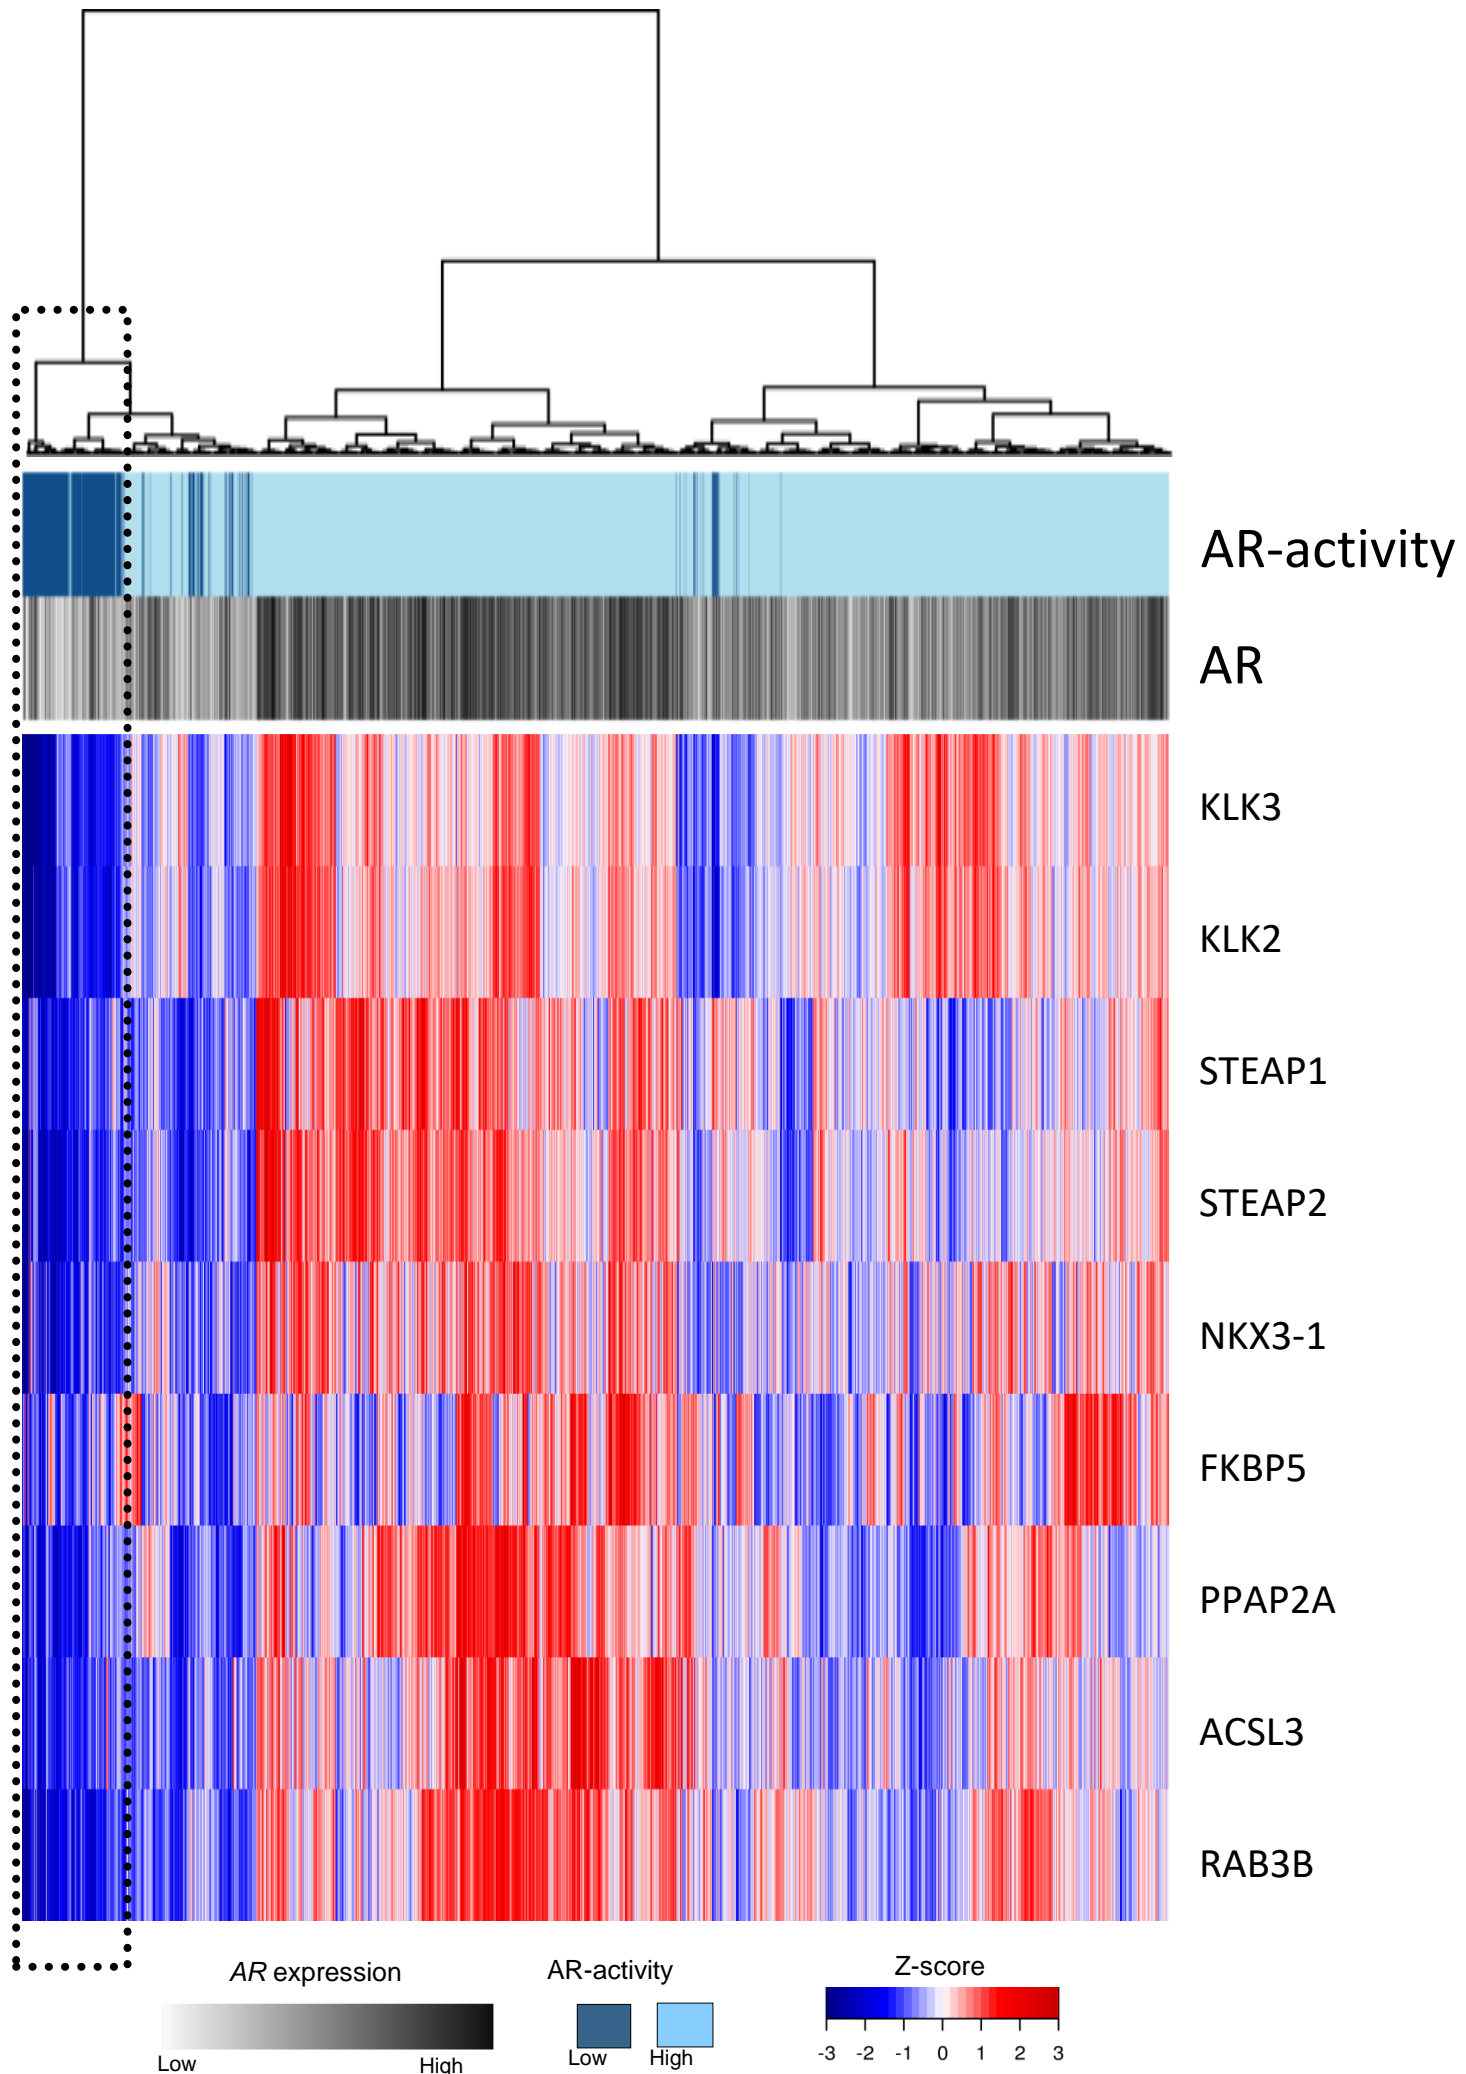

Prospective Validation Cohort

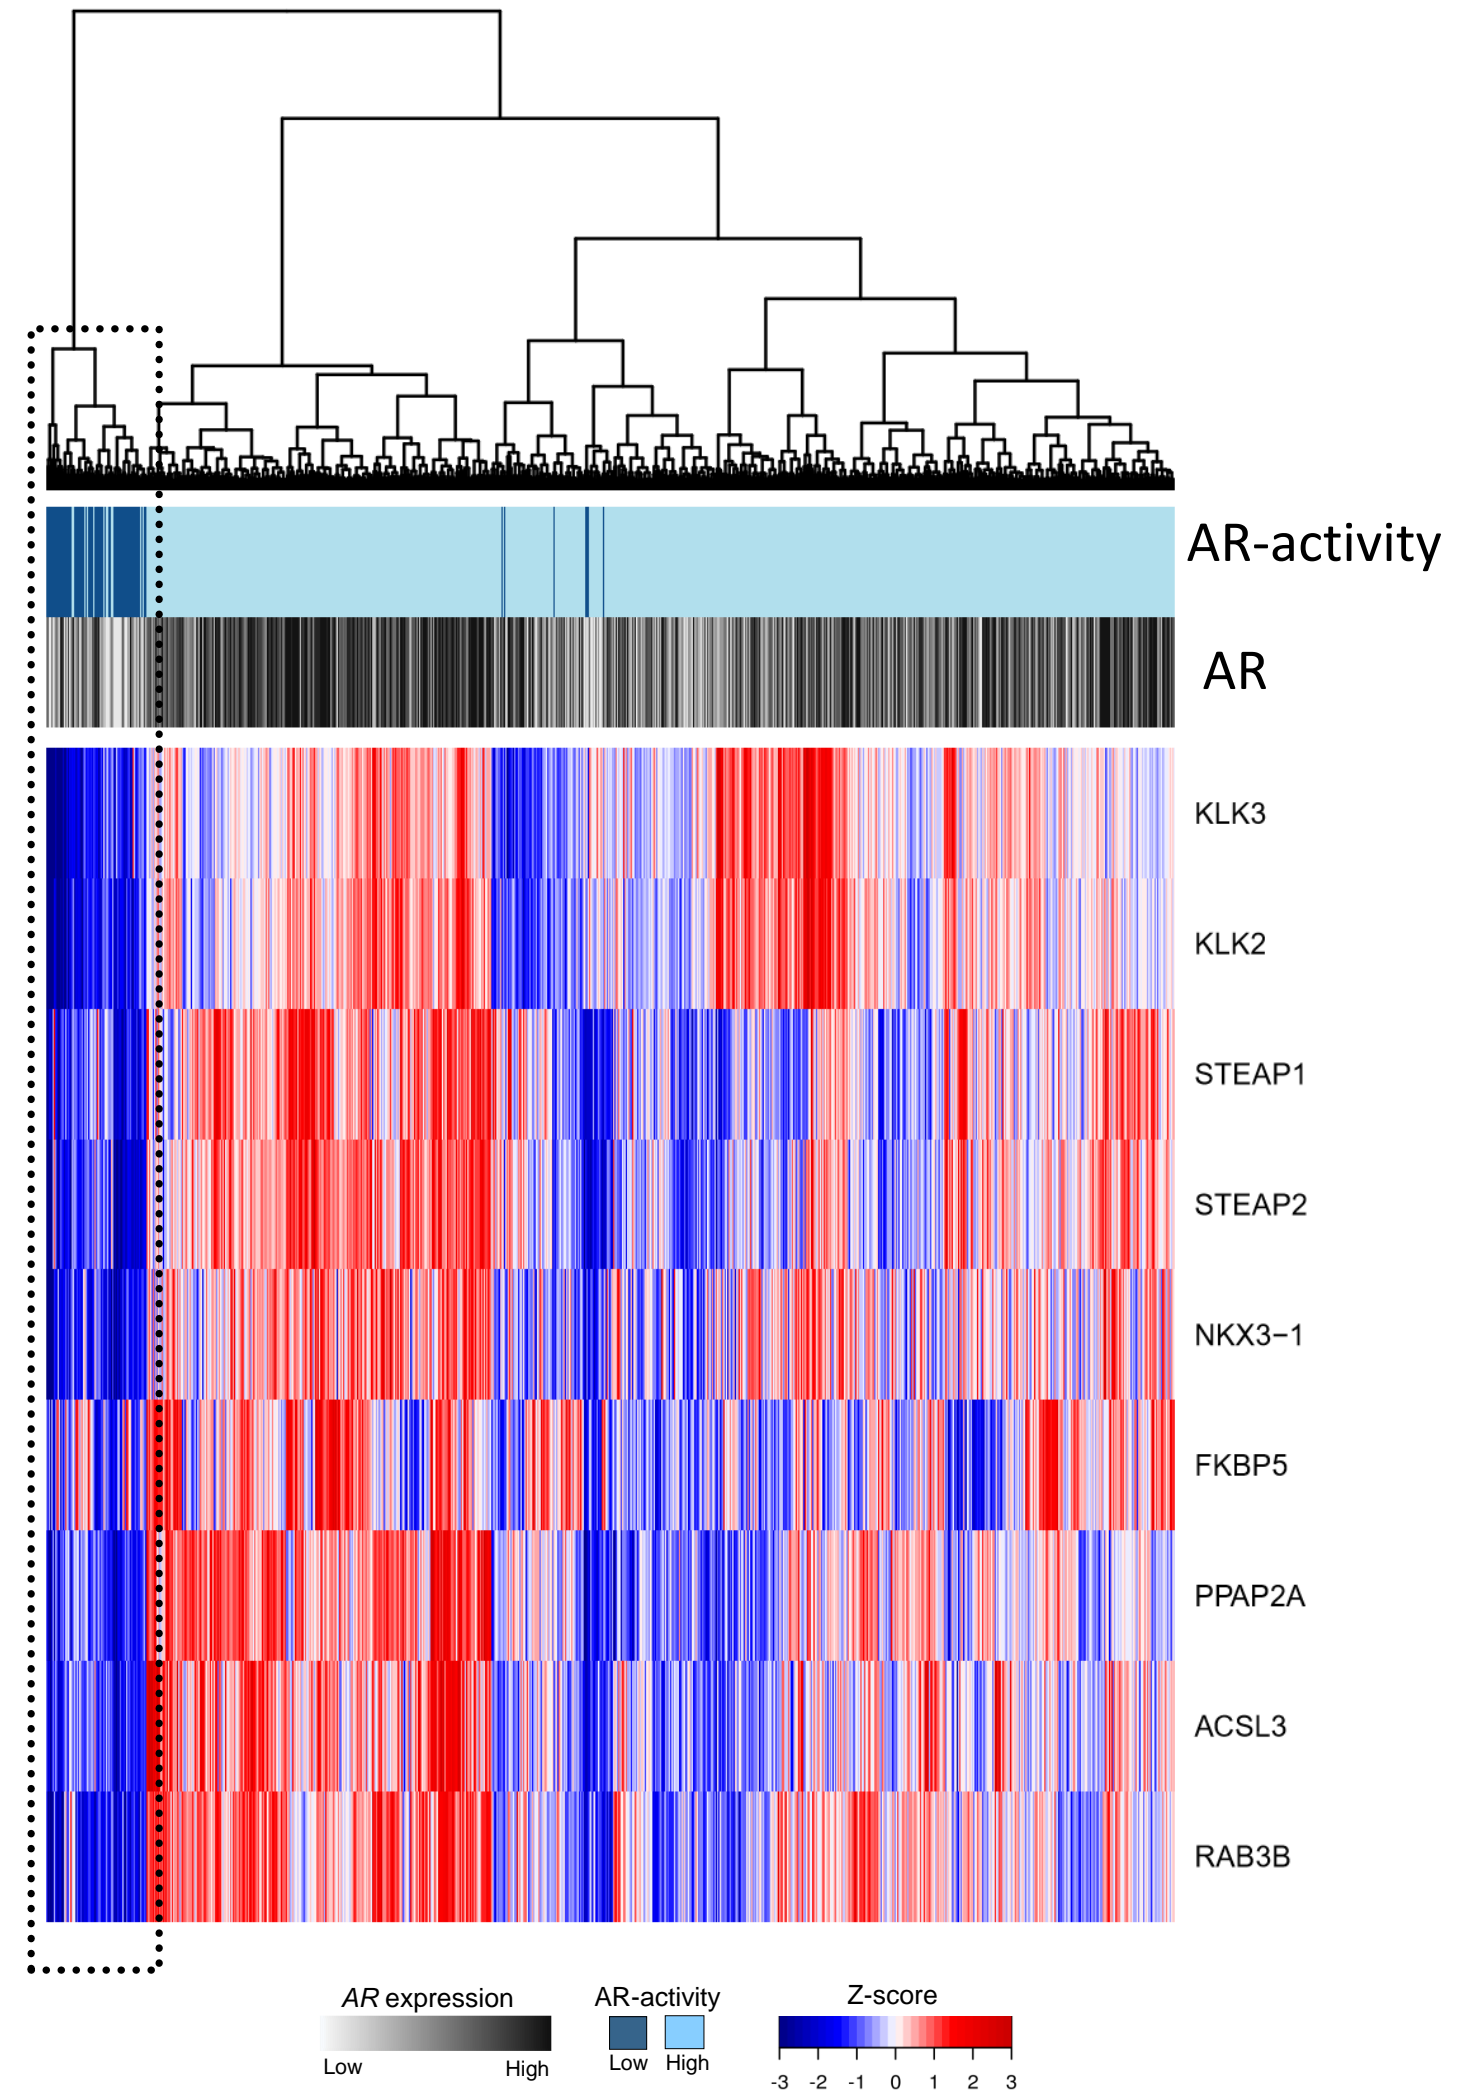

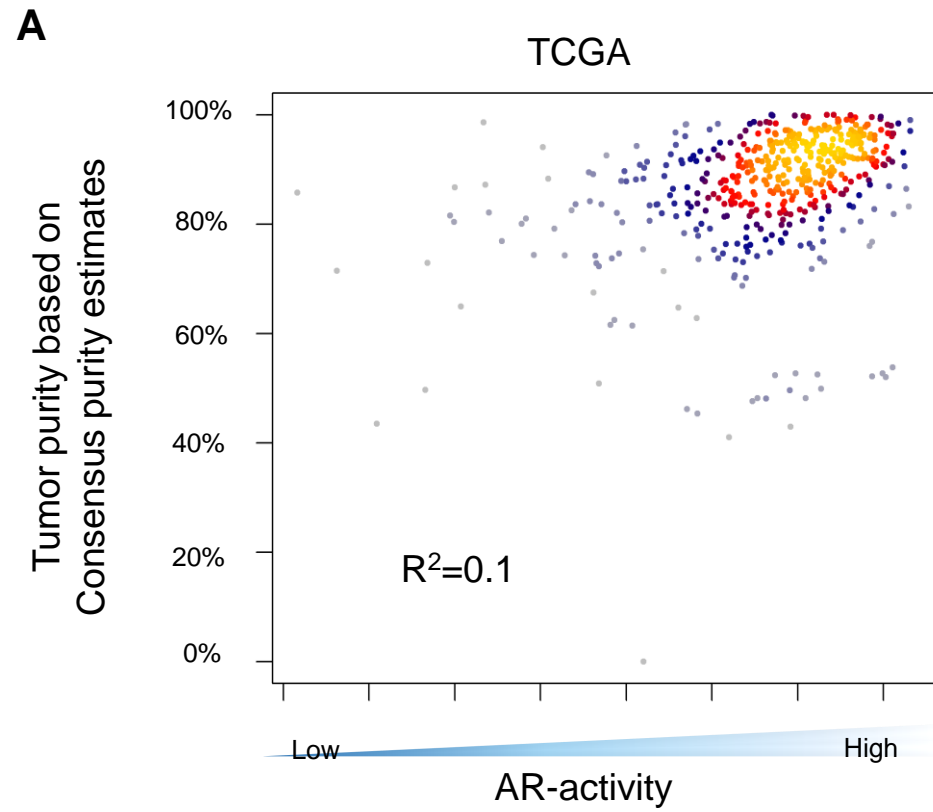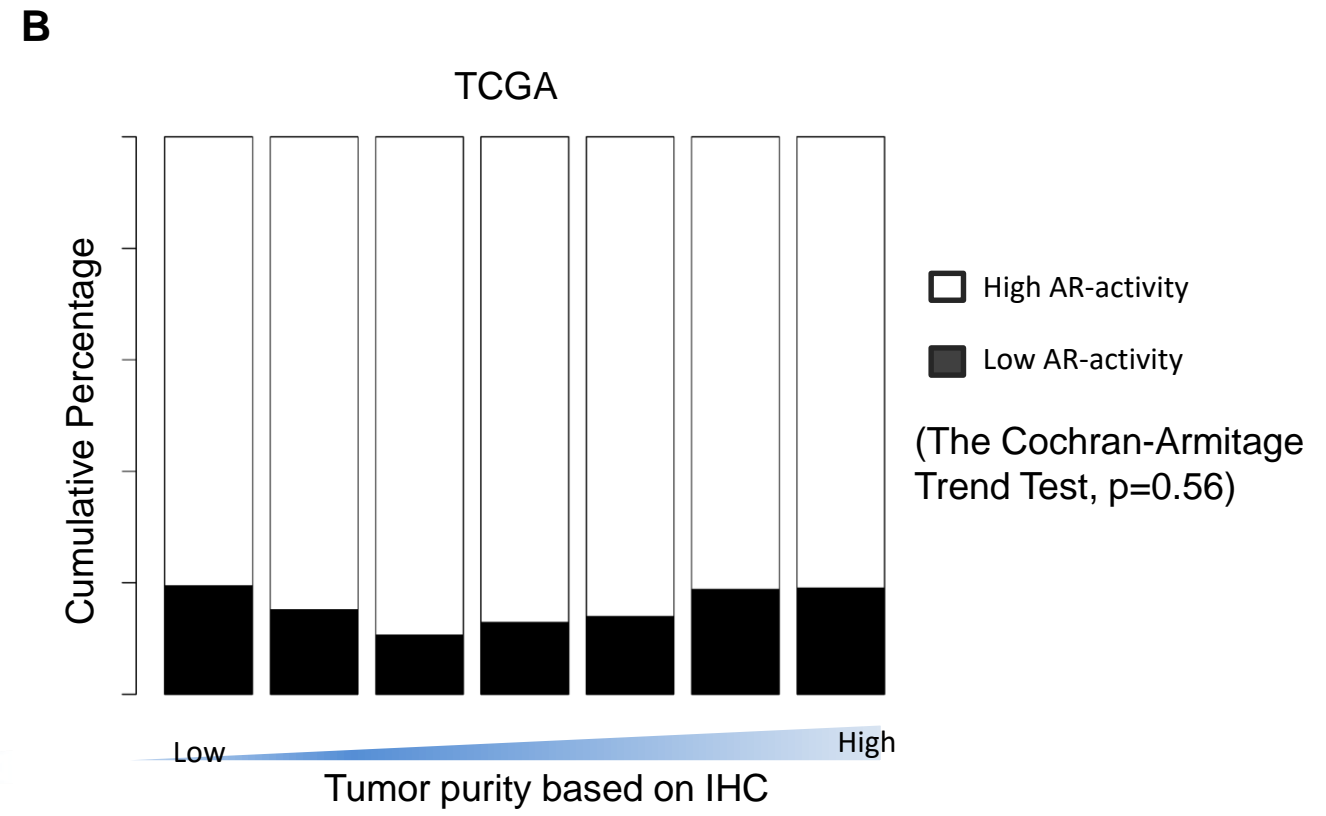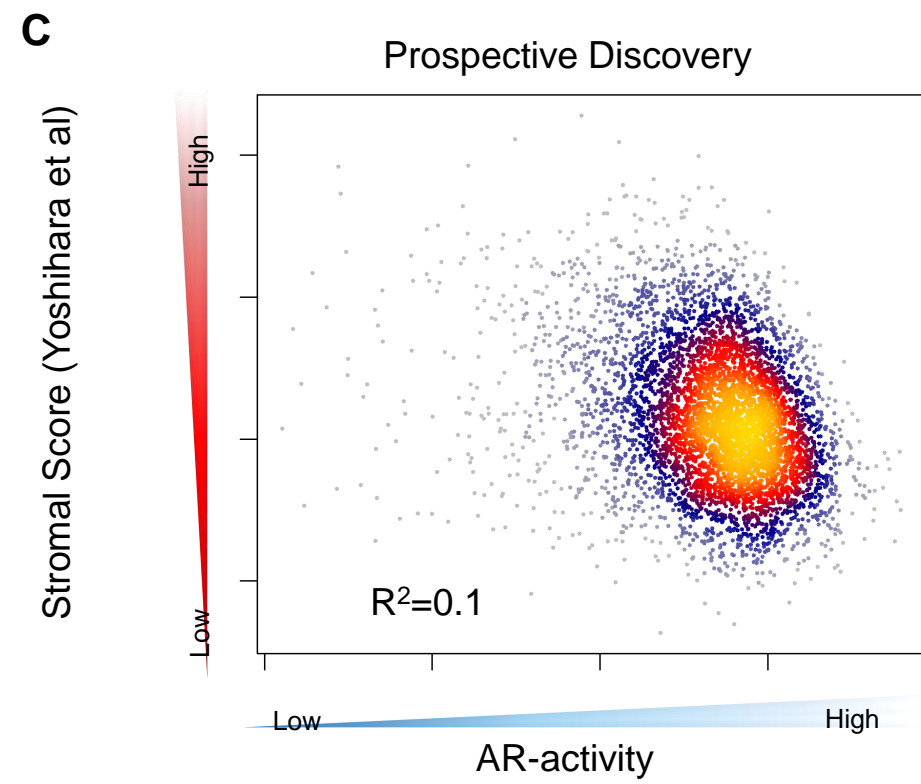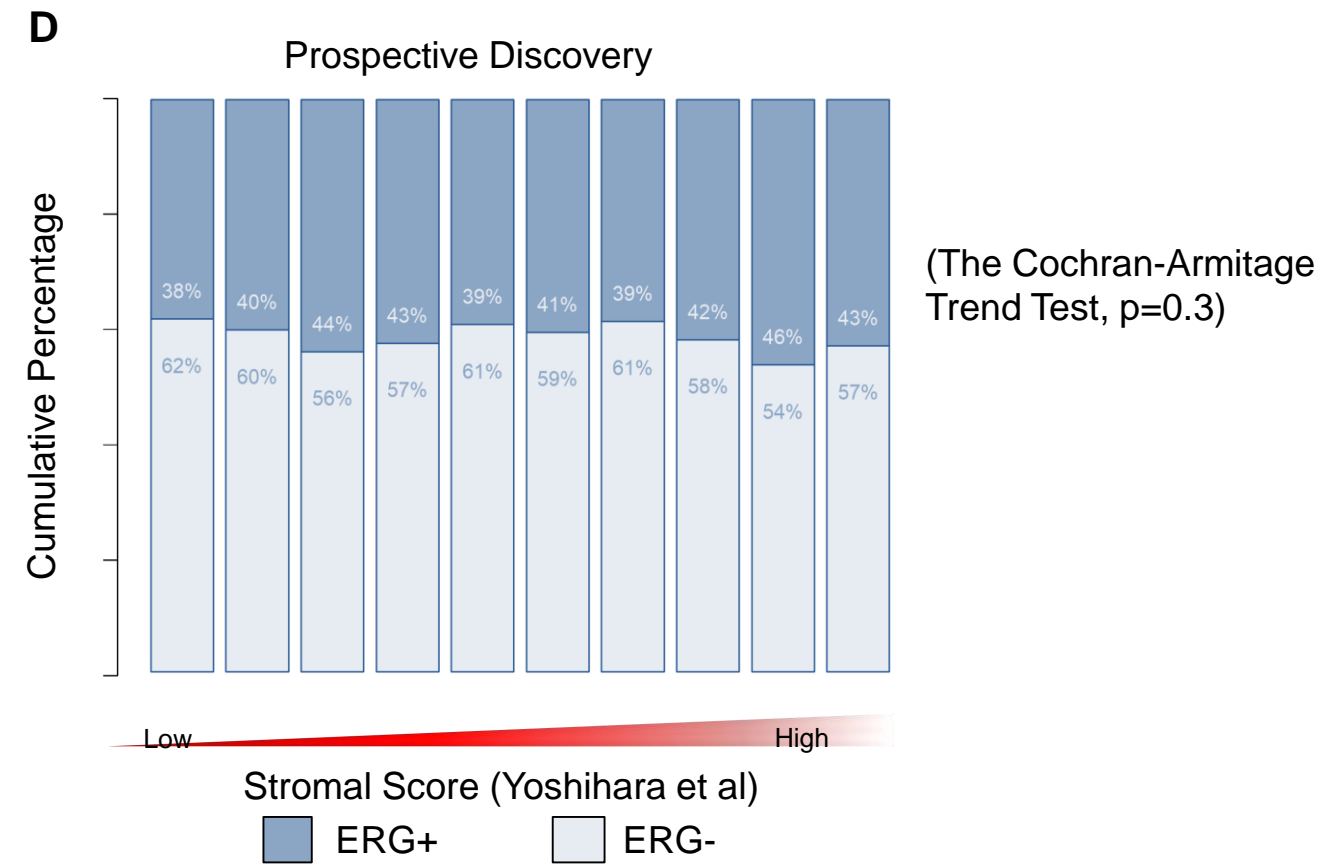

Supplementary Figure 3

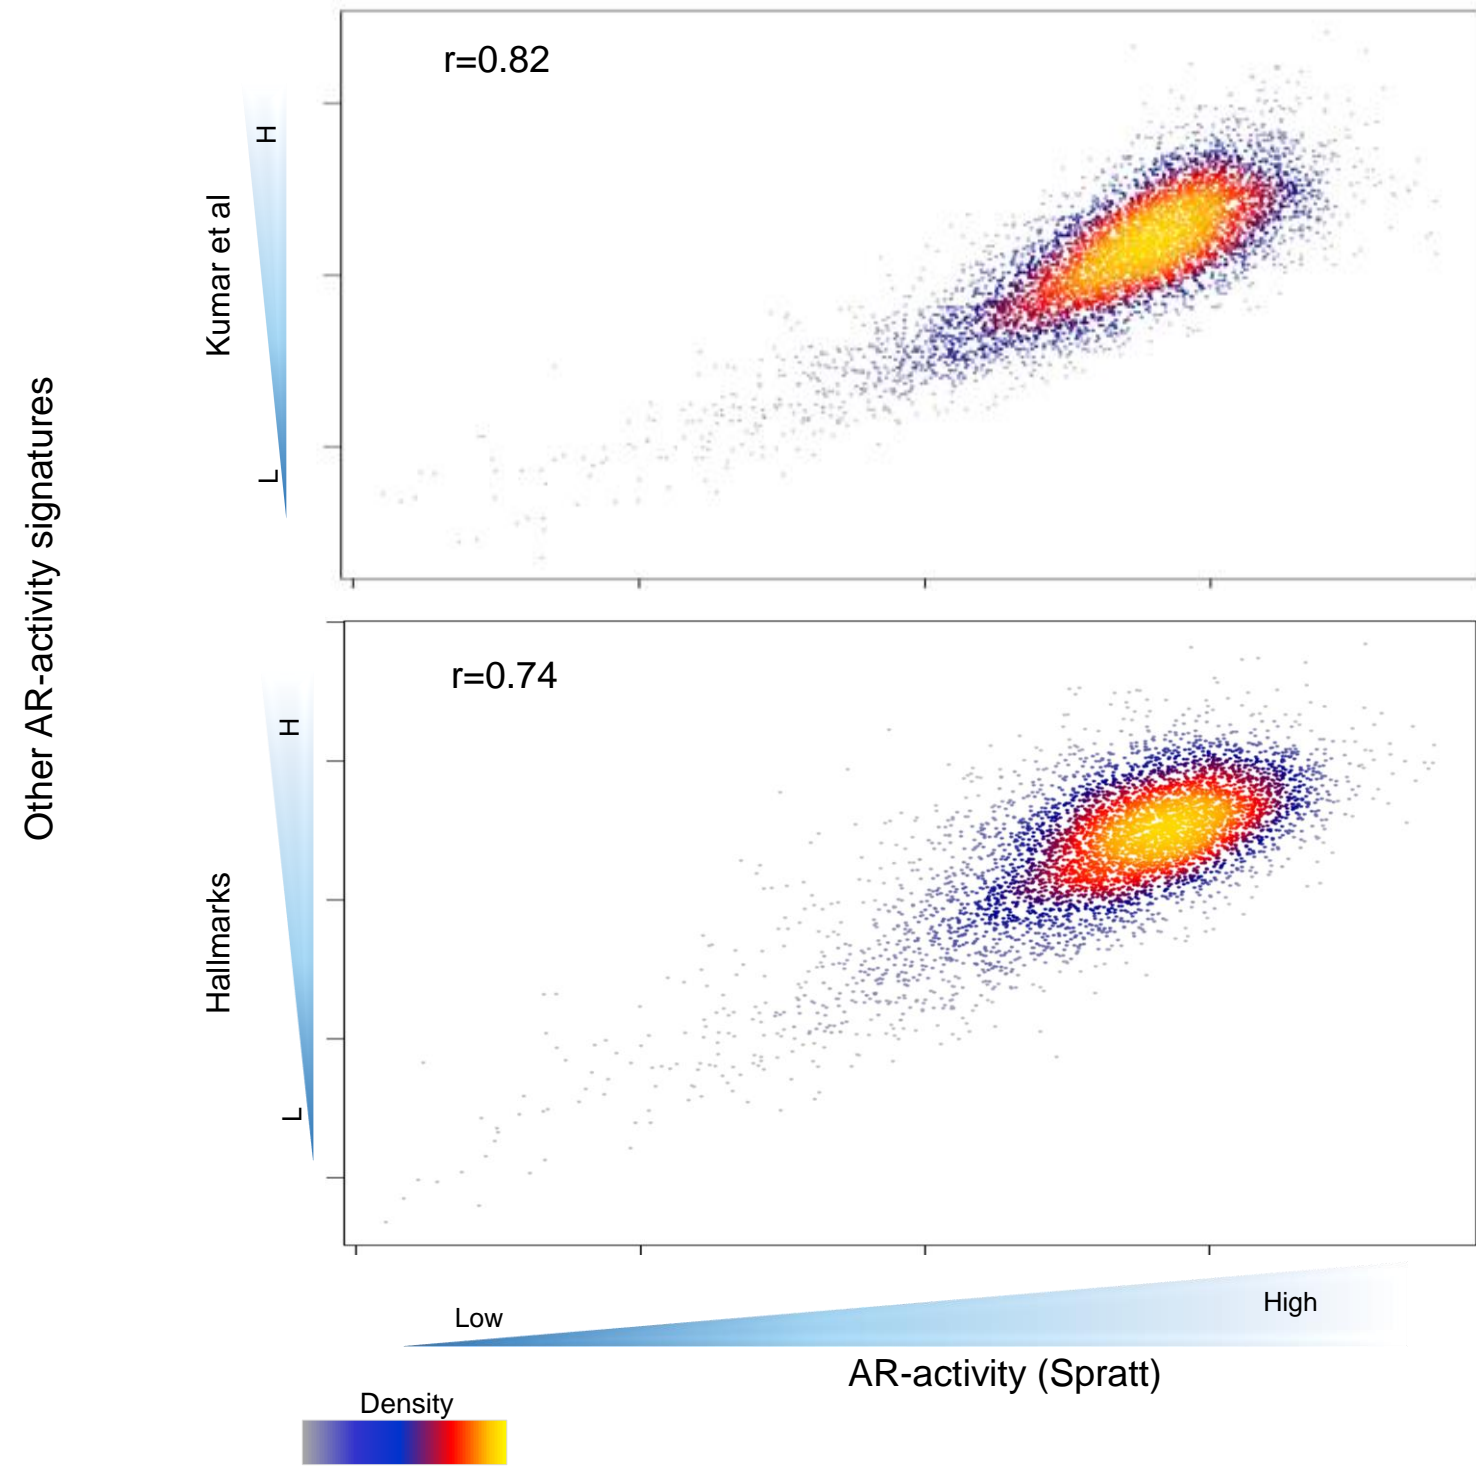

Prospective Validation Cohort

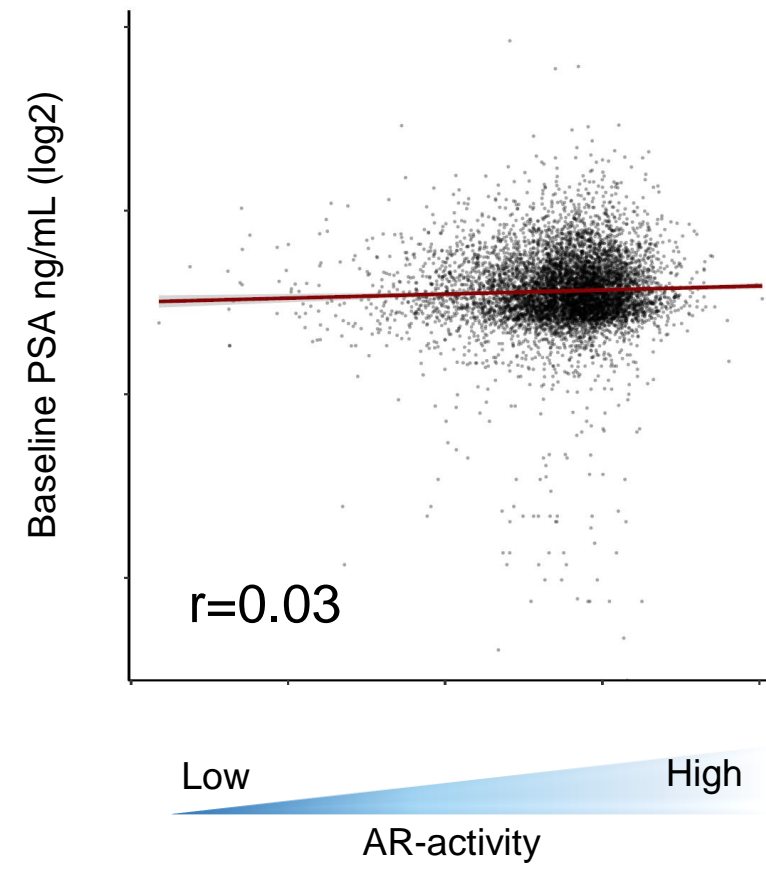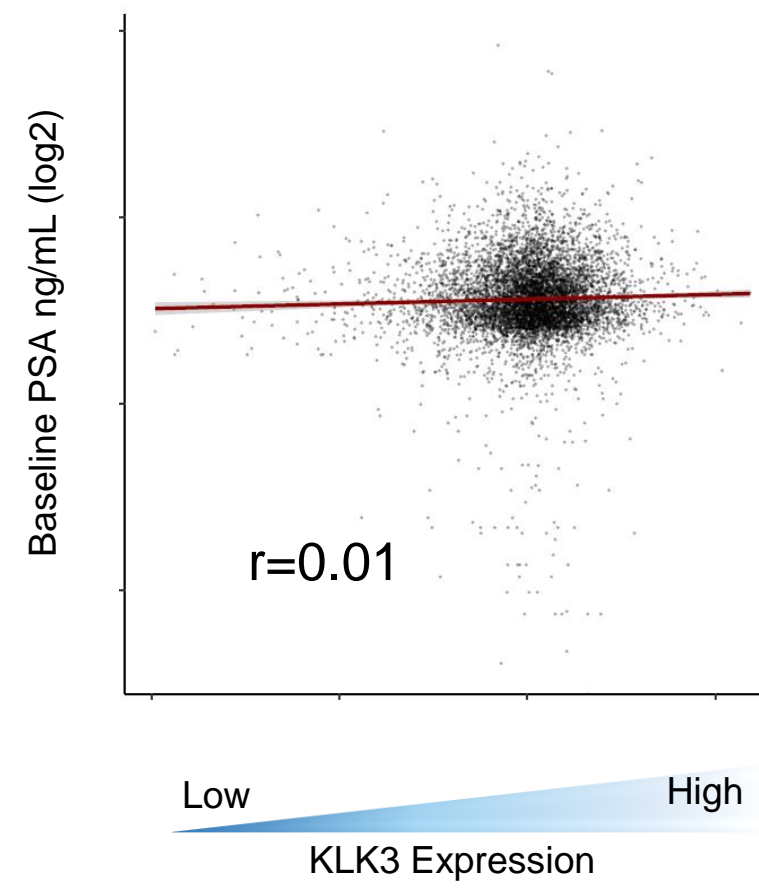

Supplementary Figure 5

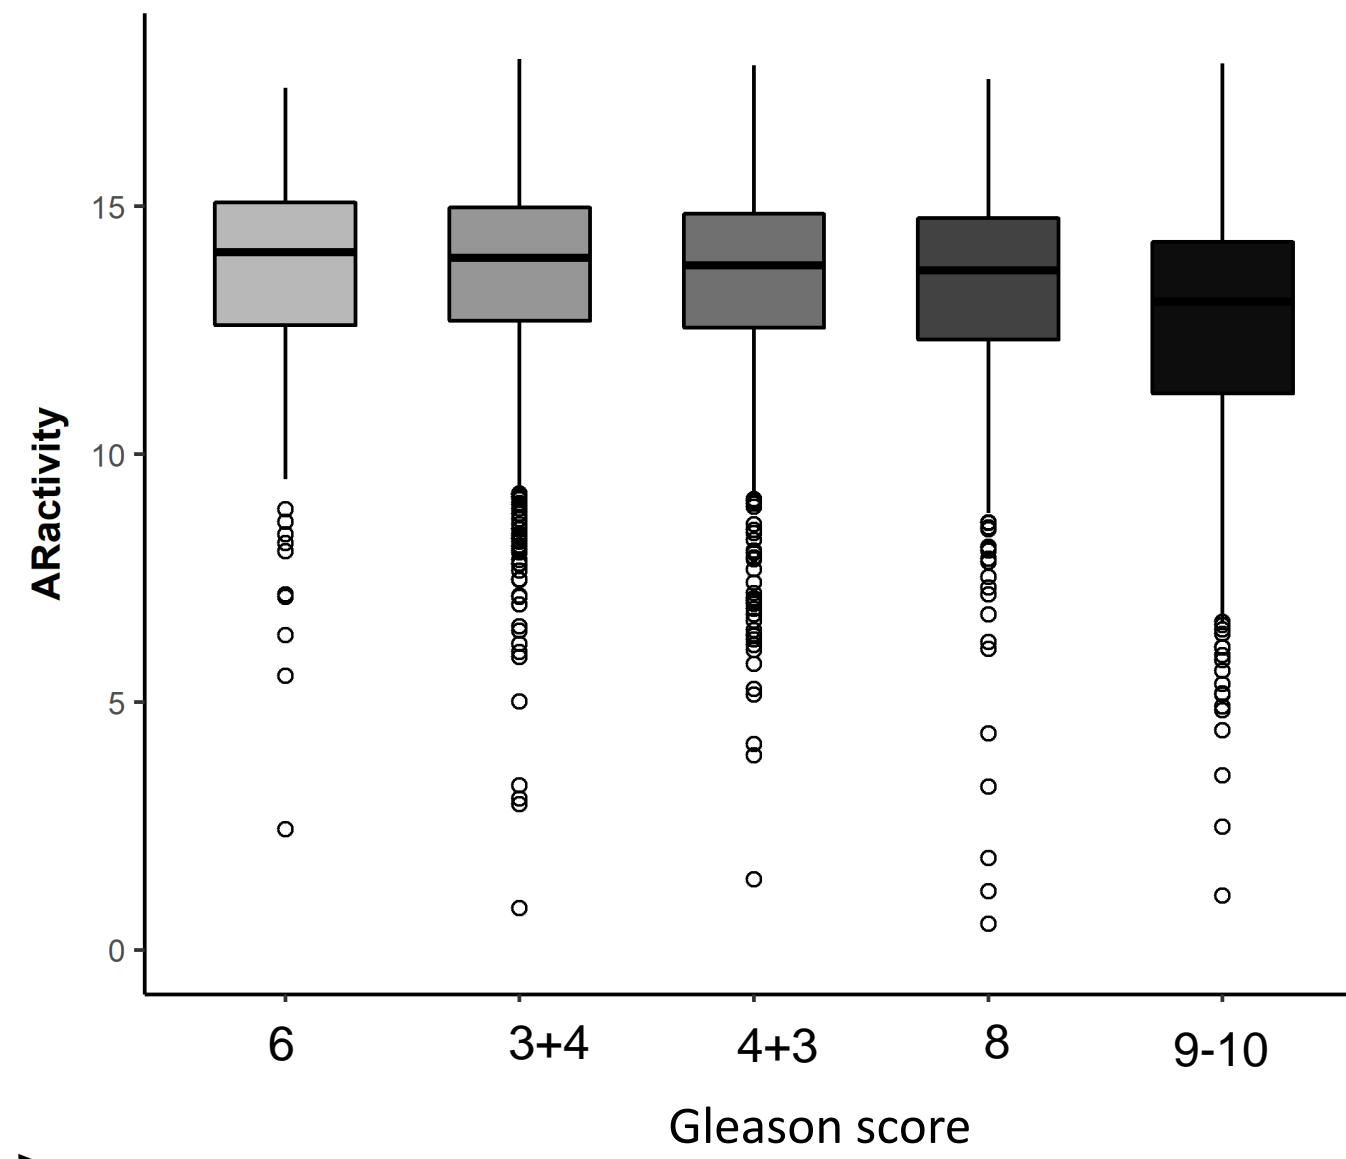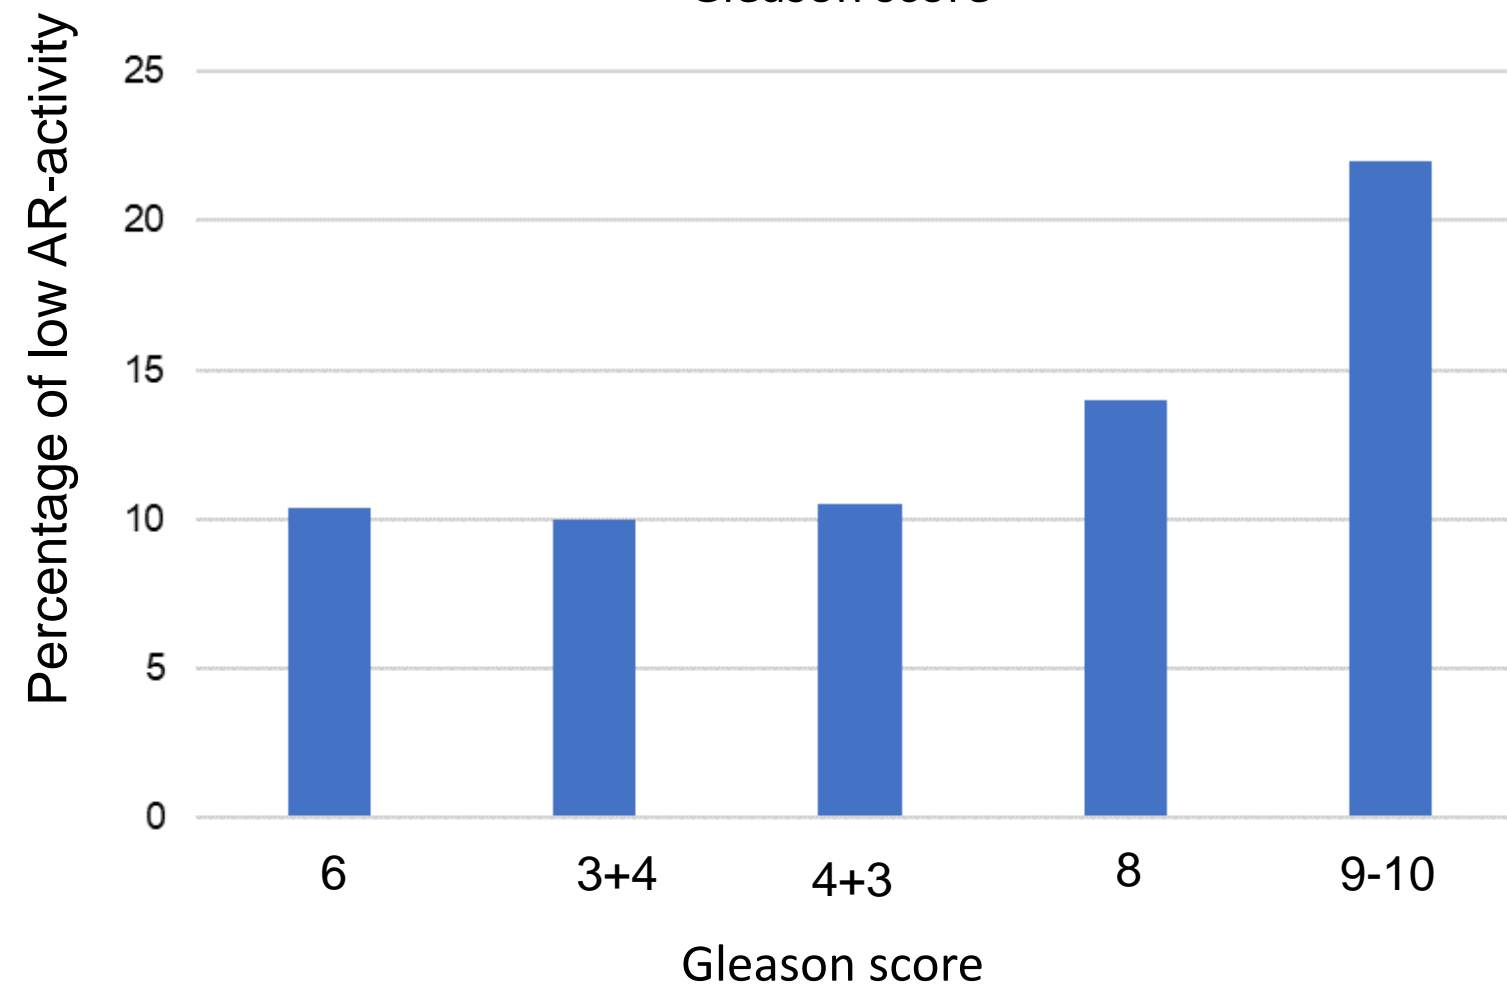

**A**

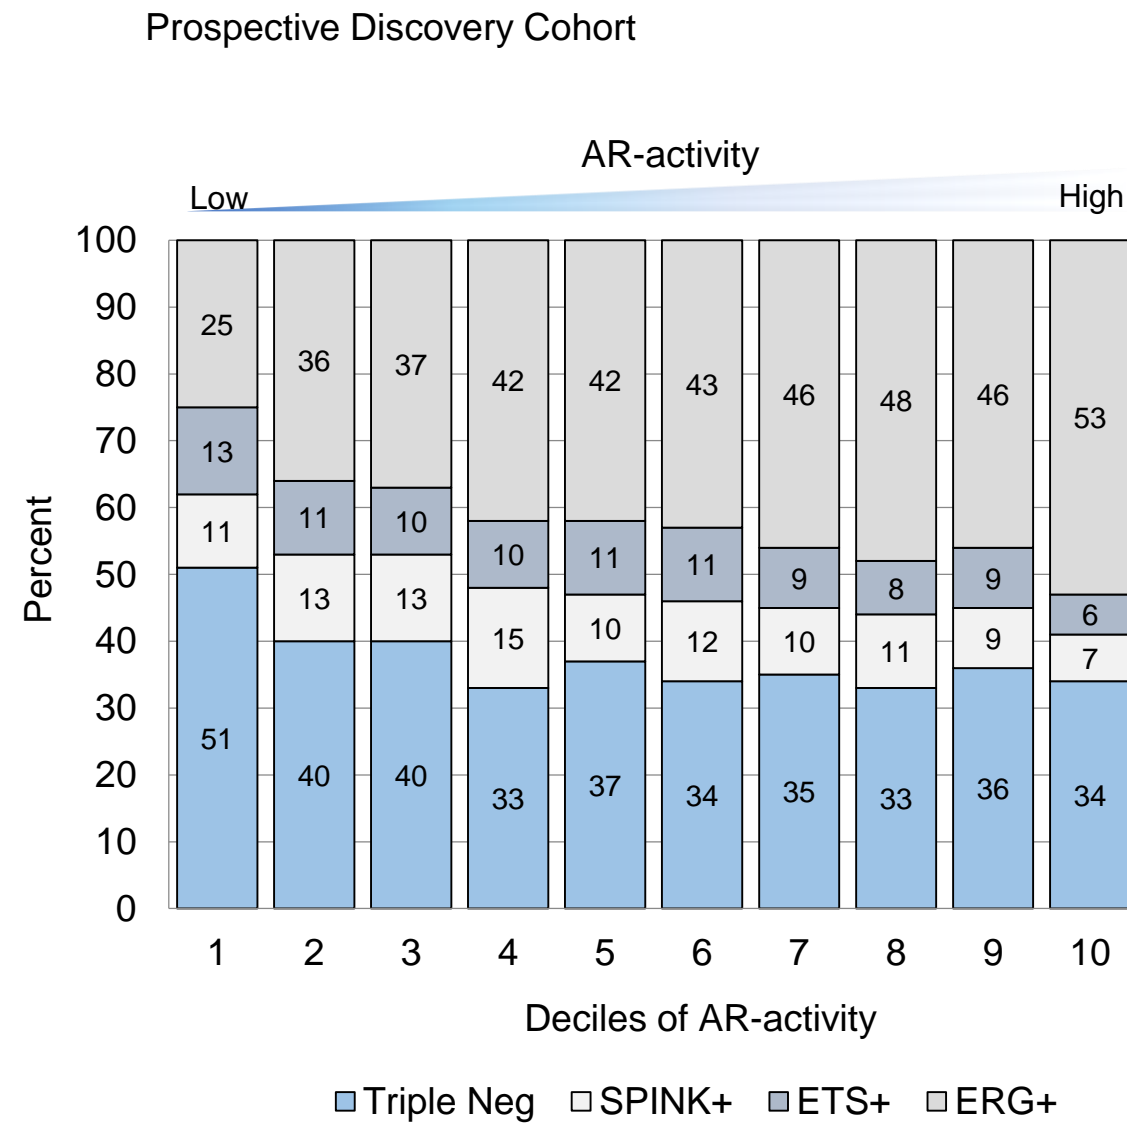

**B**

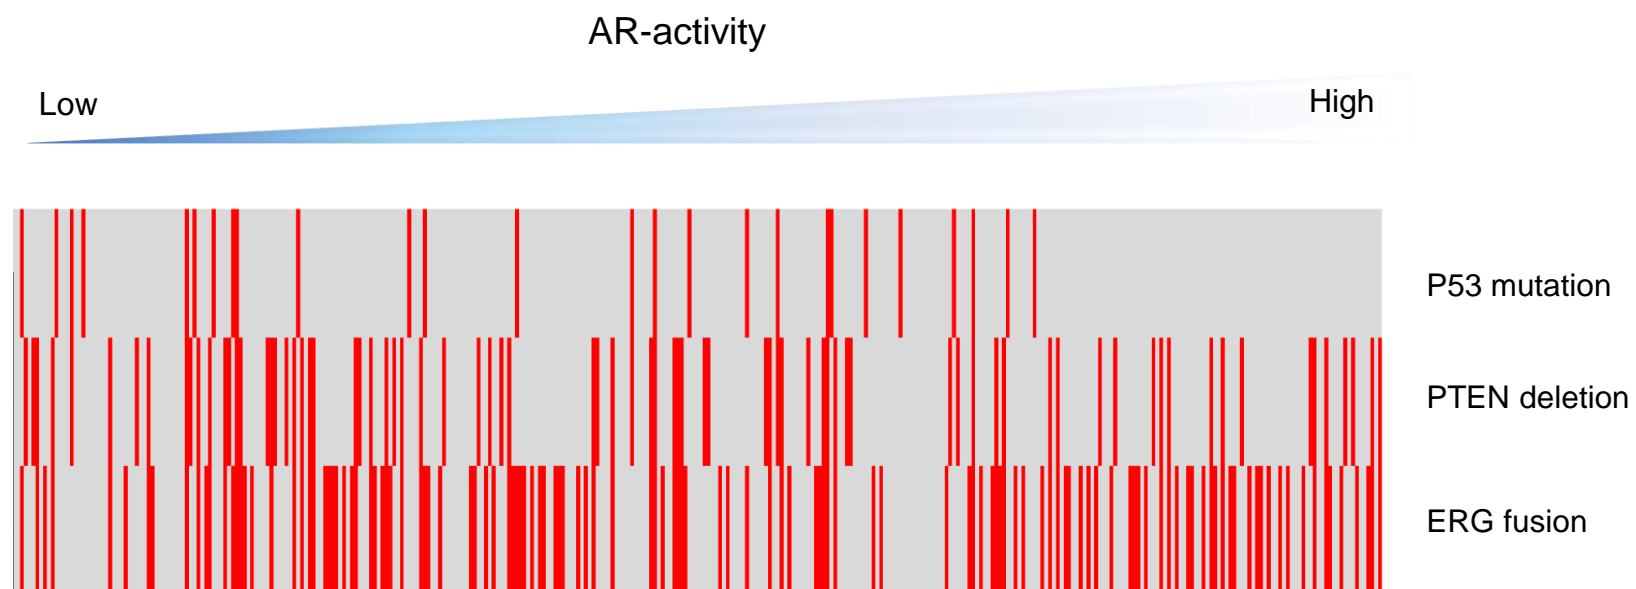

Supplementary Figure 7

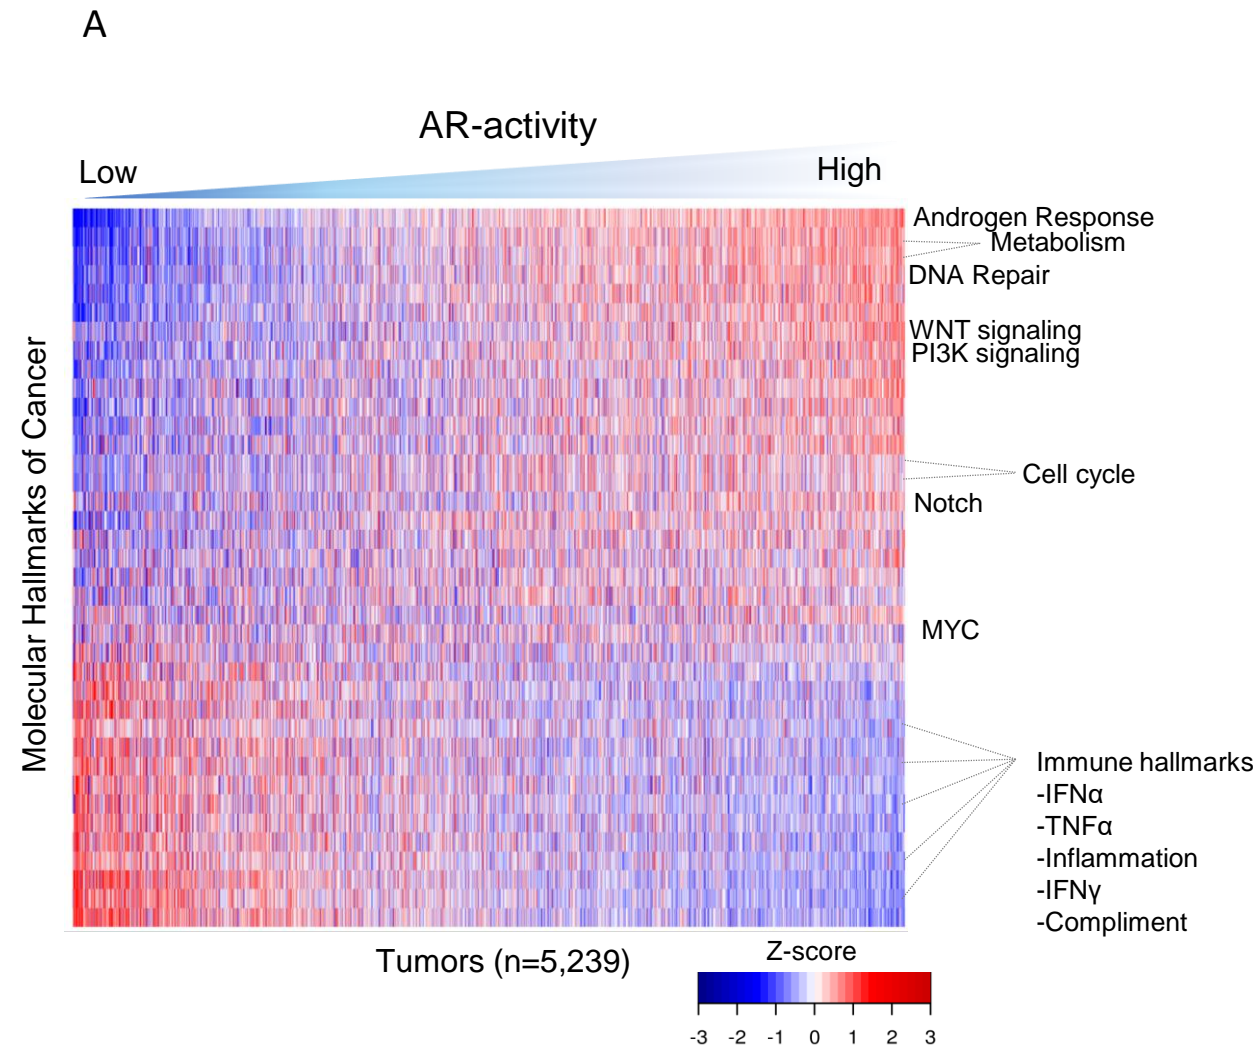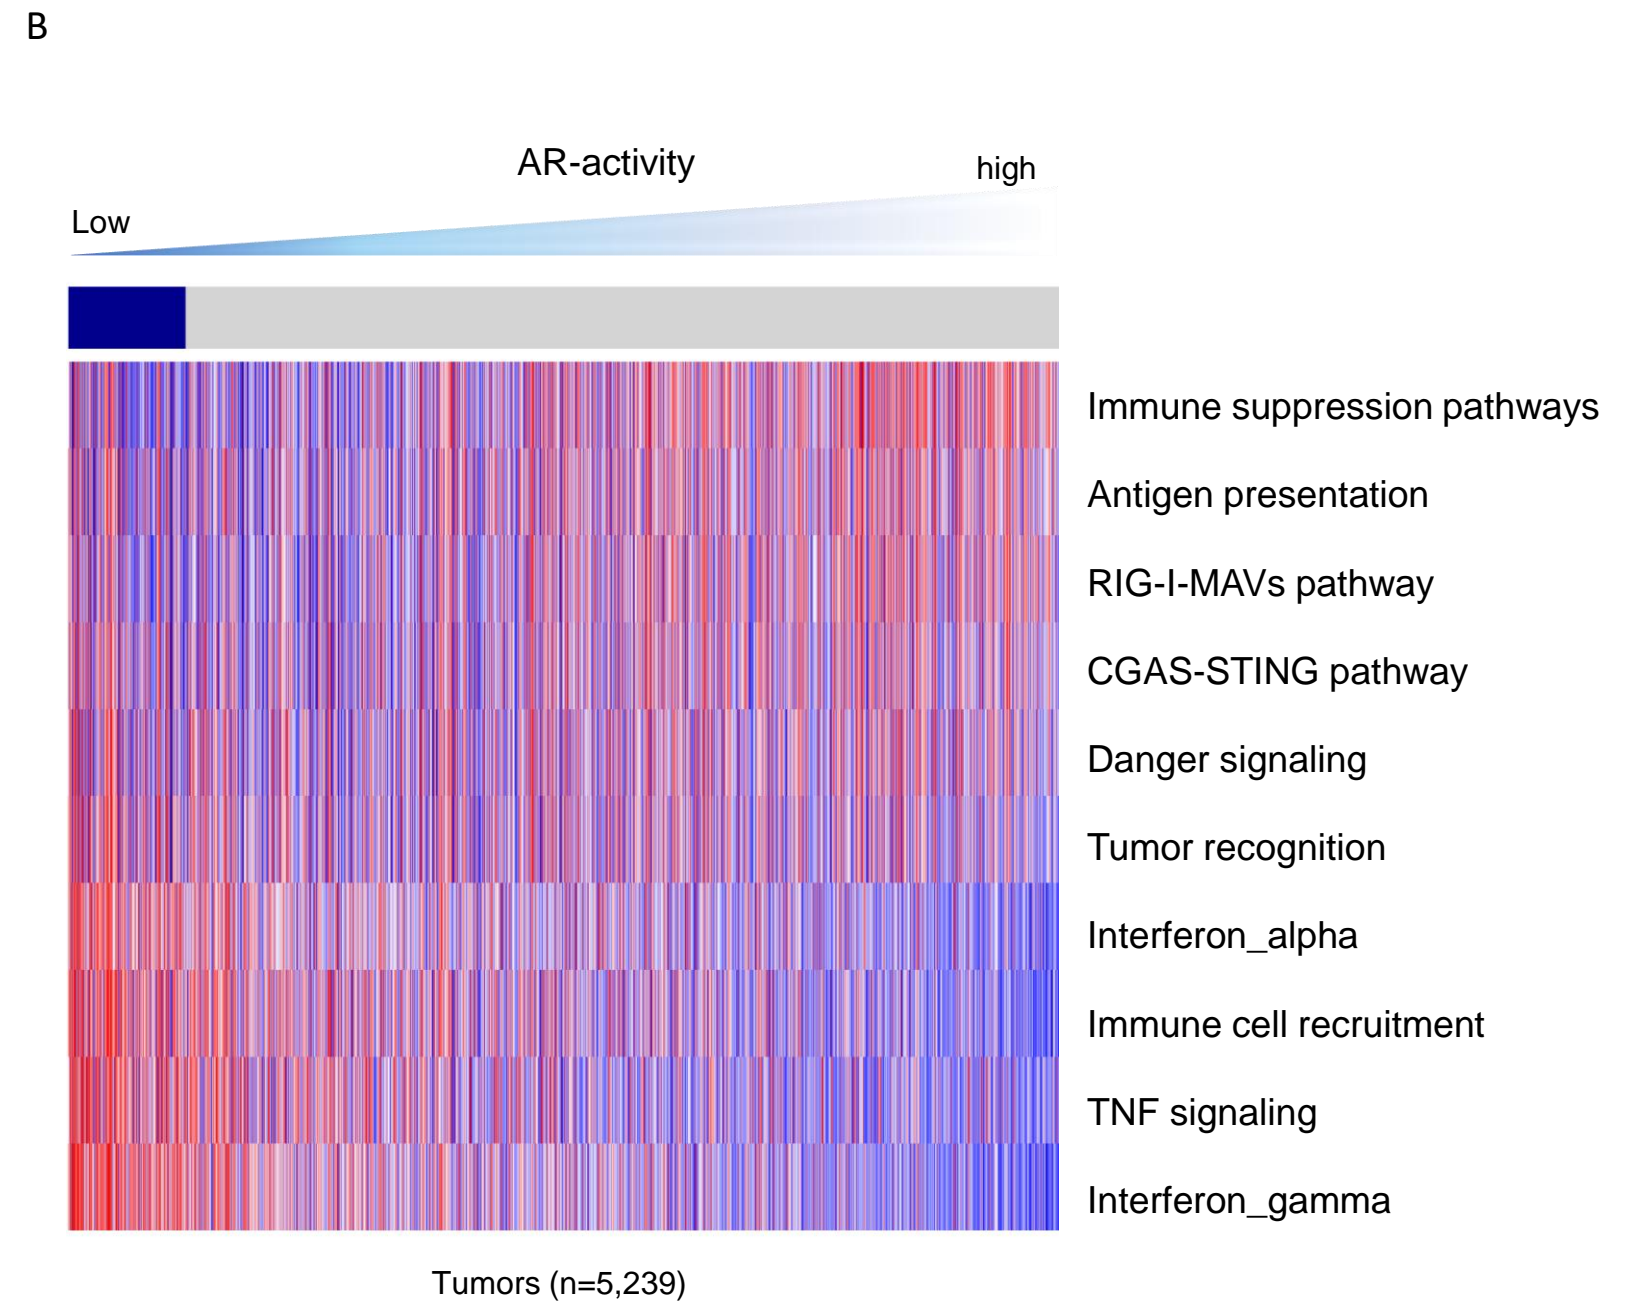



Chemokine-chemokine interaction

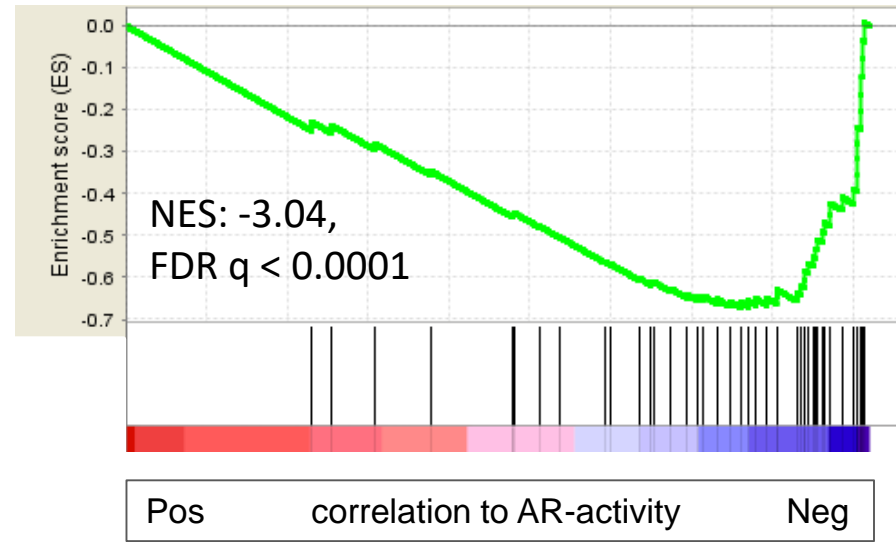

Immunoregulatory interactions

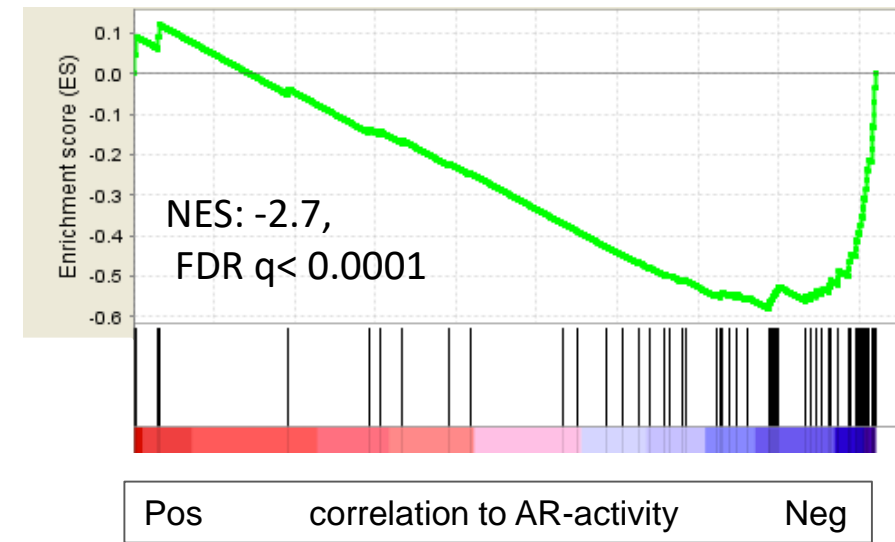

PD1 signaling

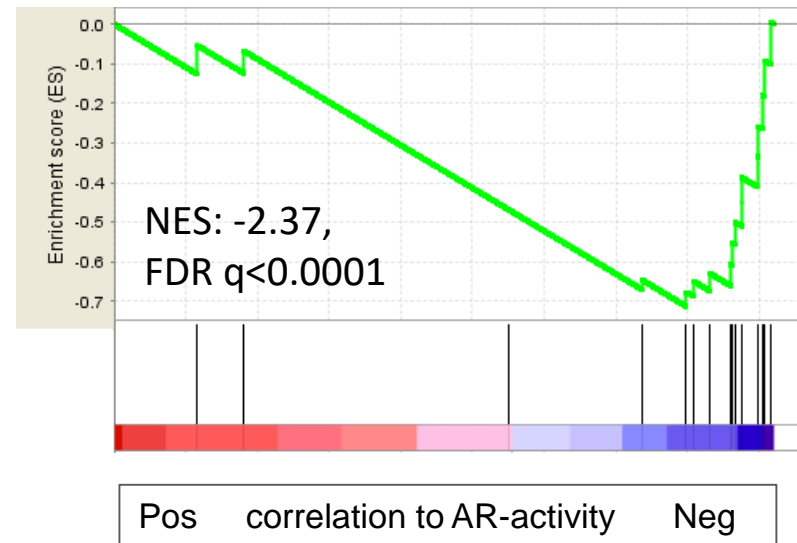

Phosphorylation of CD3

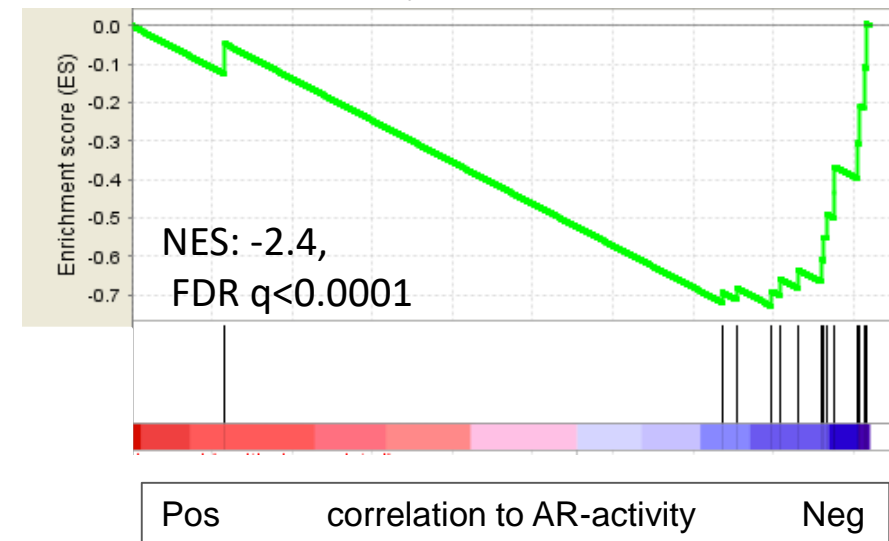





Supplementary Figure 10

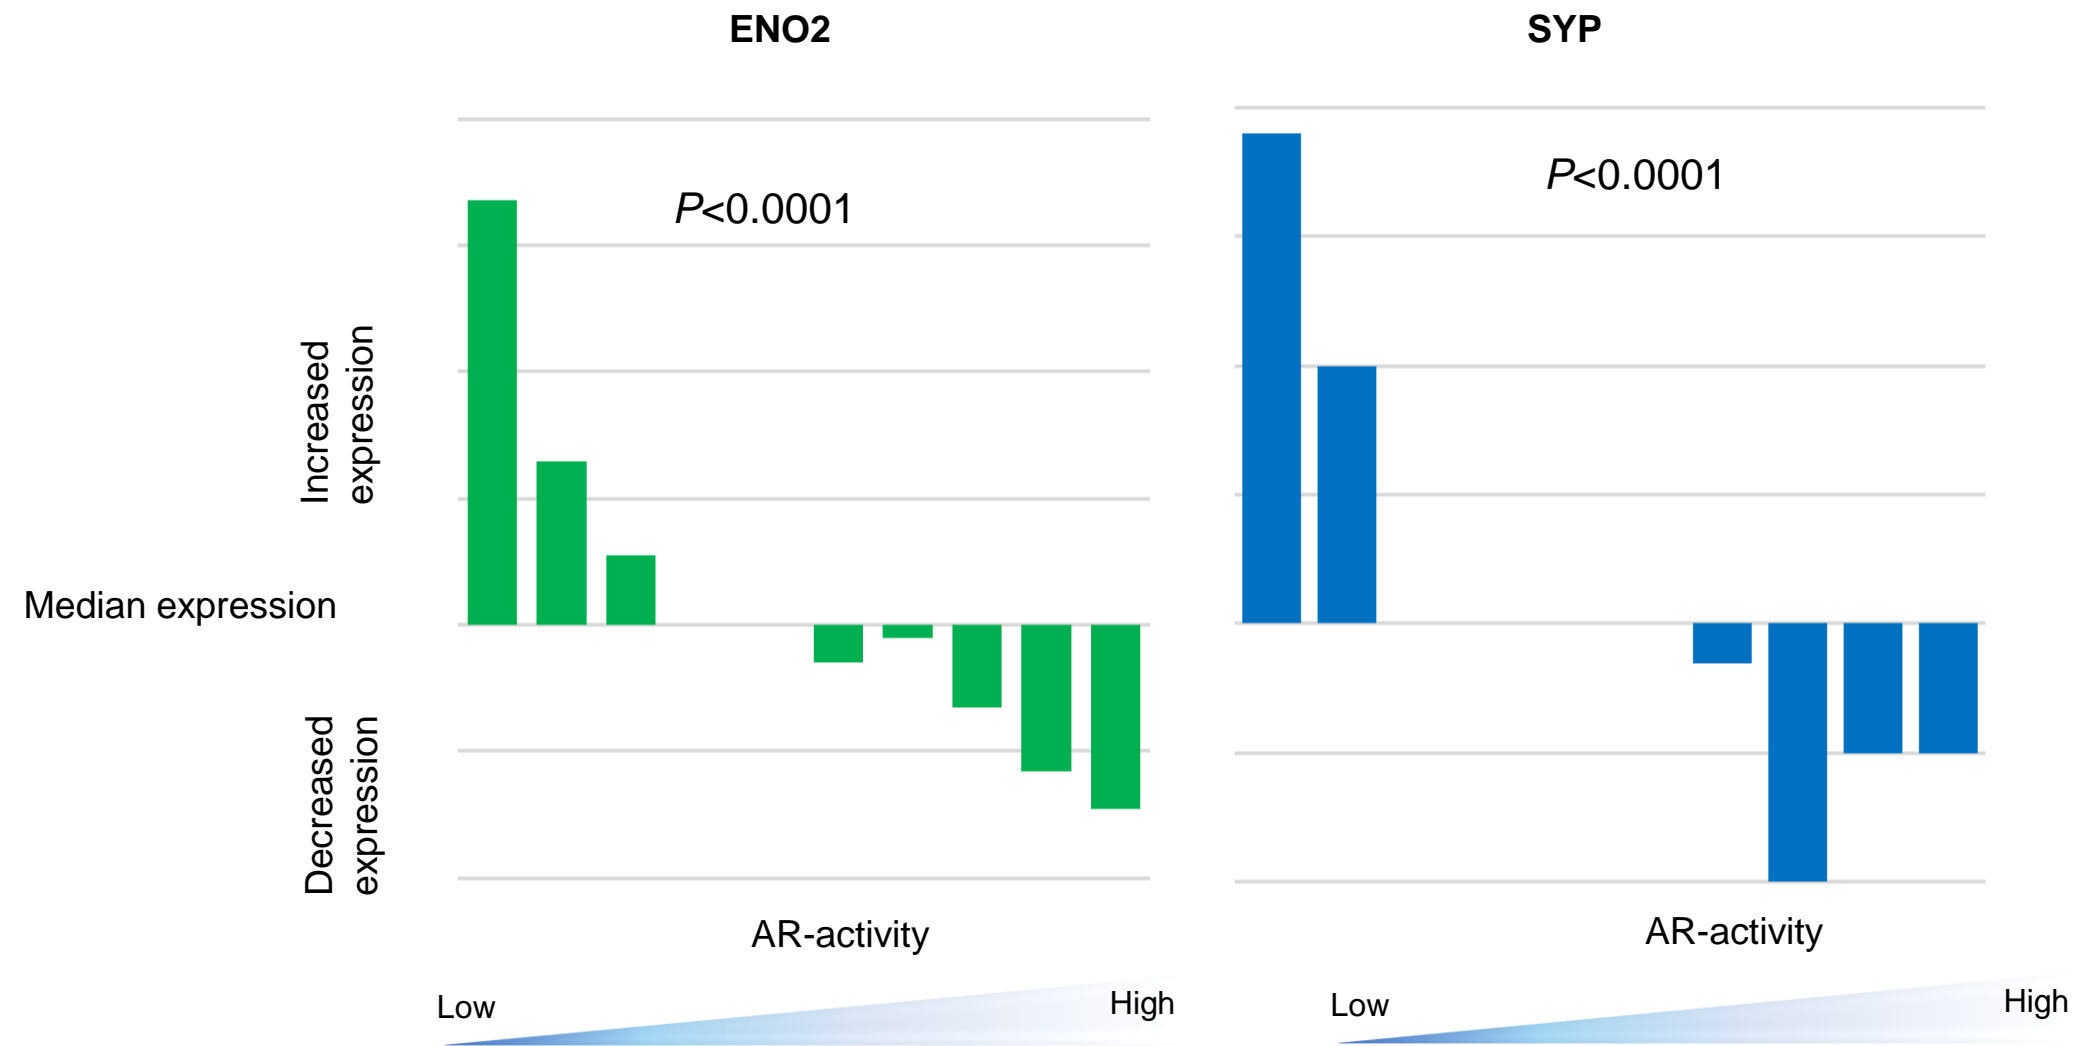

Supplementary Figure 11

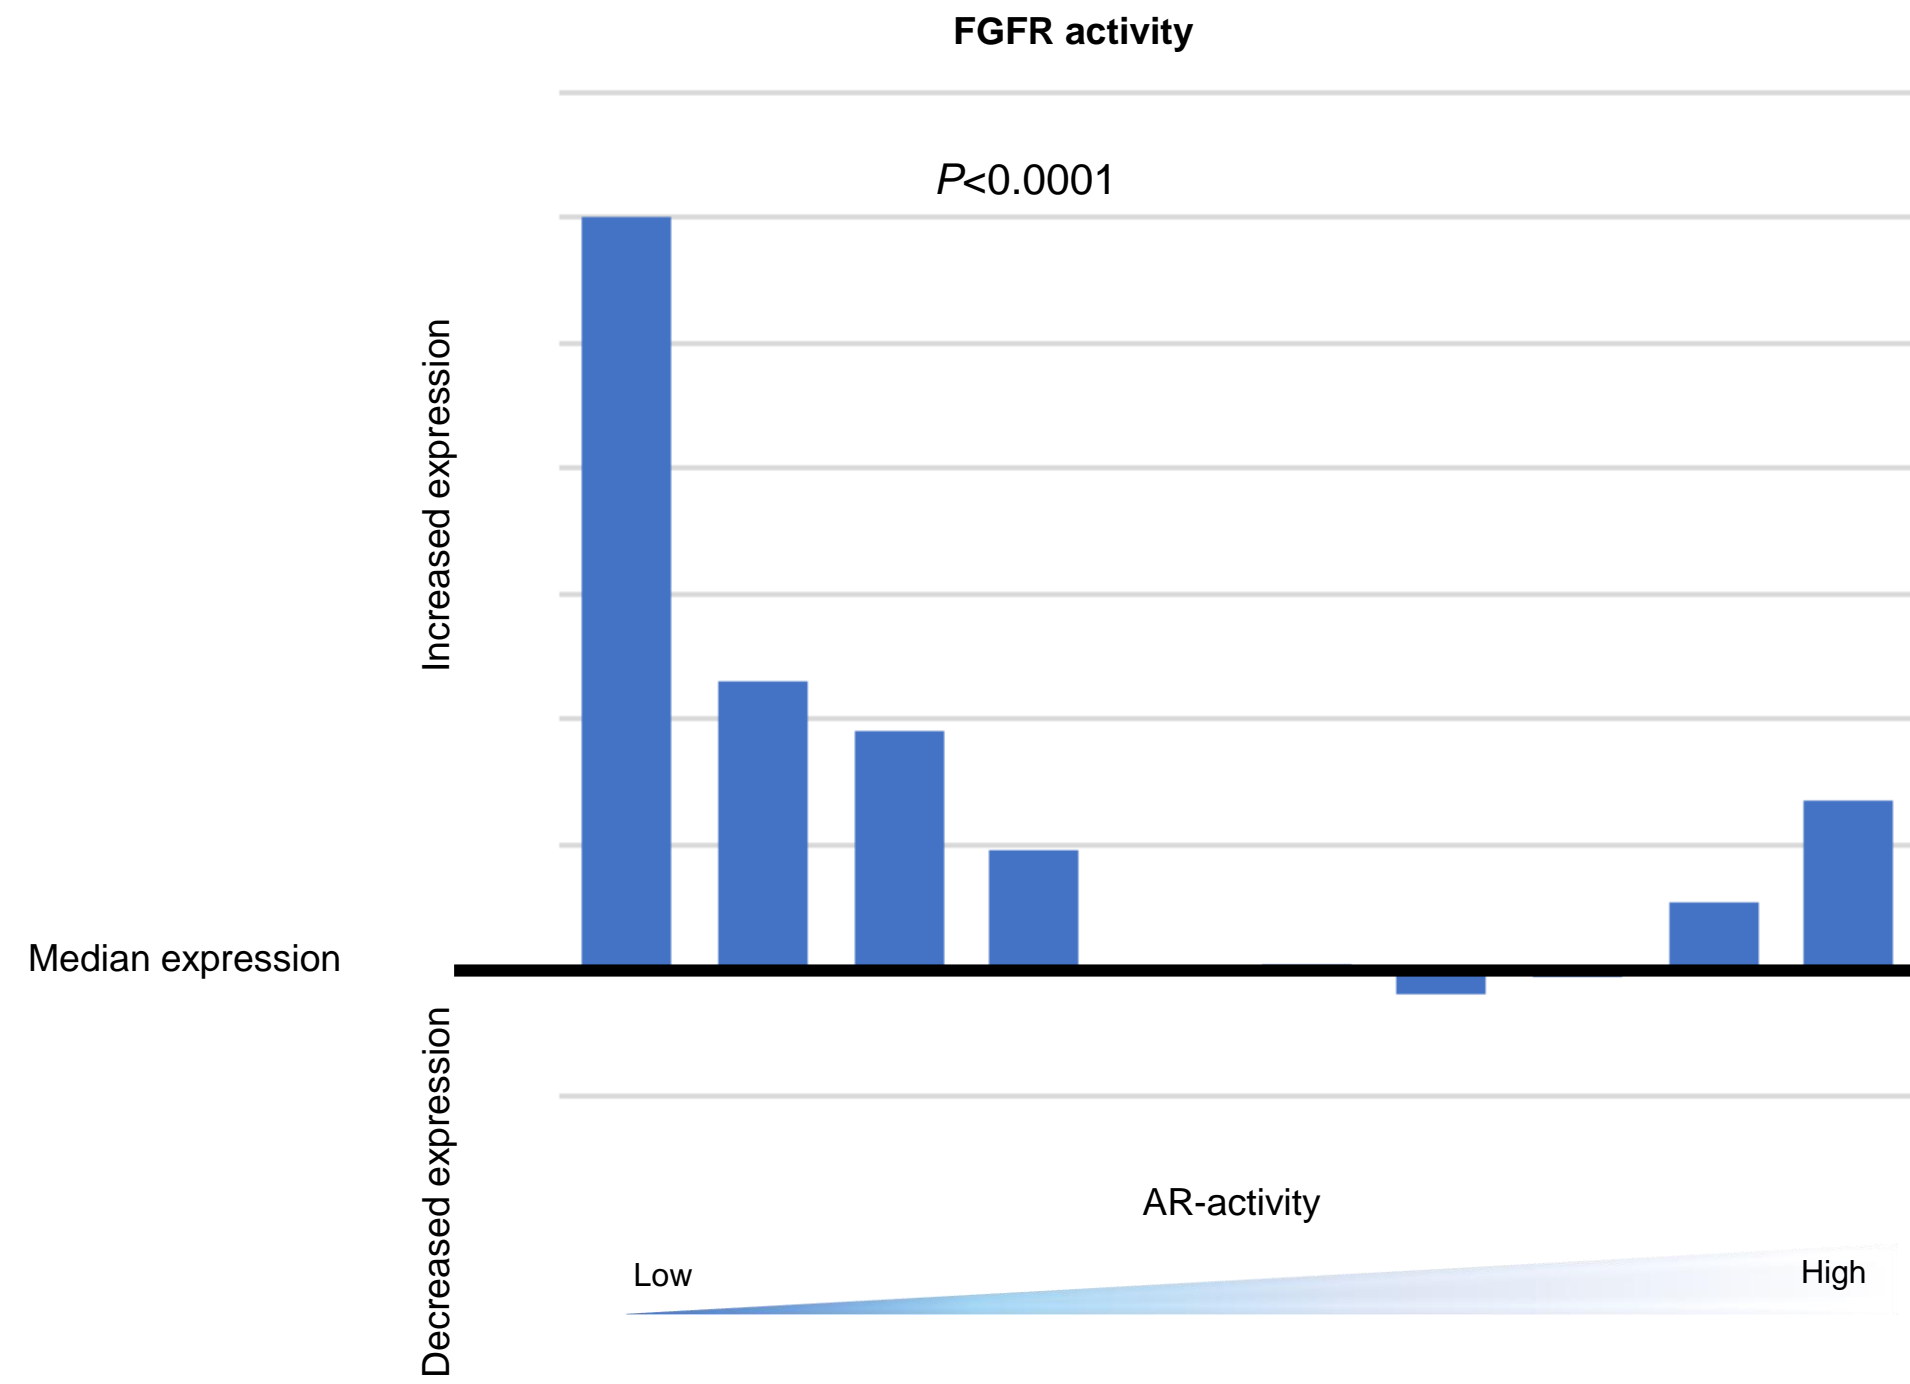

Supplementary Figure 12

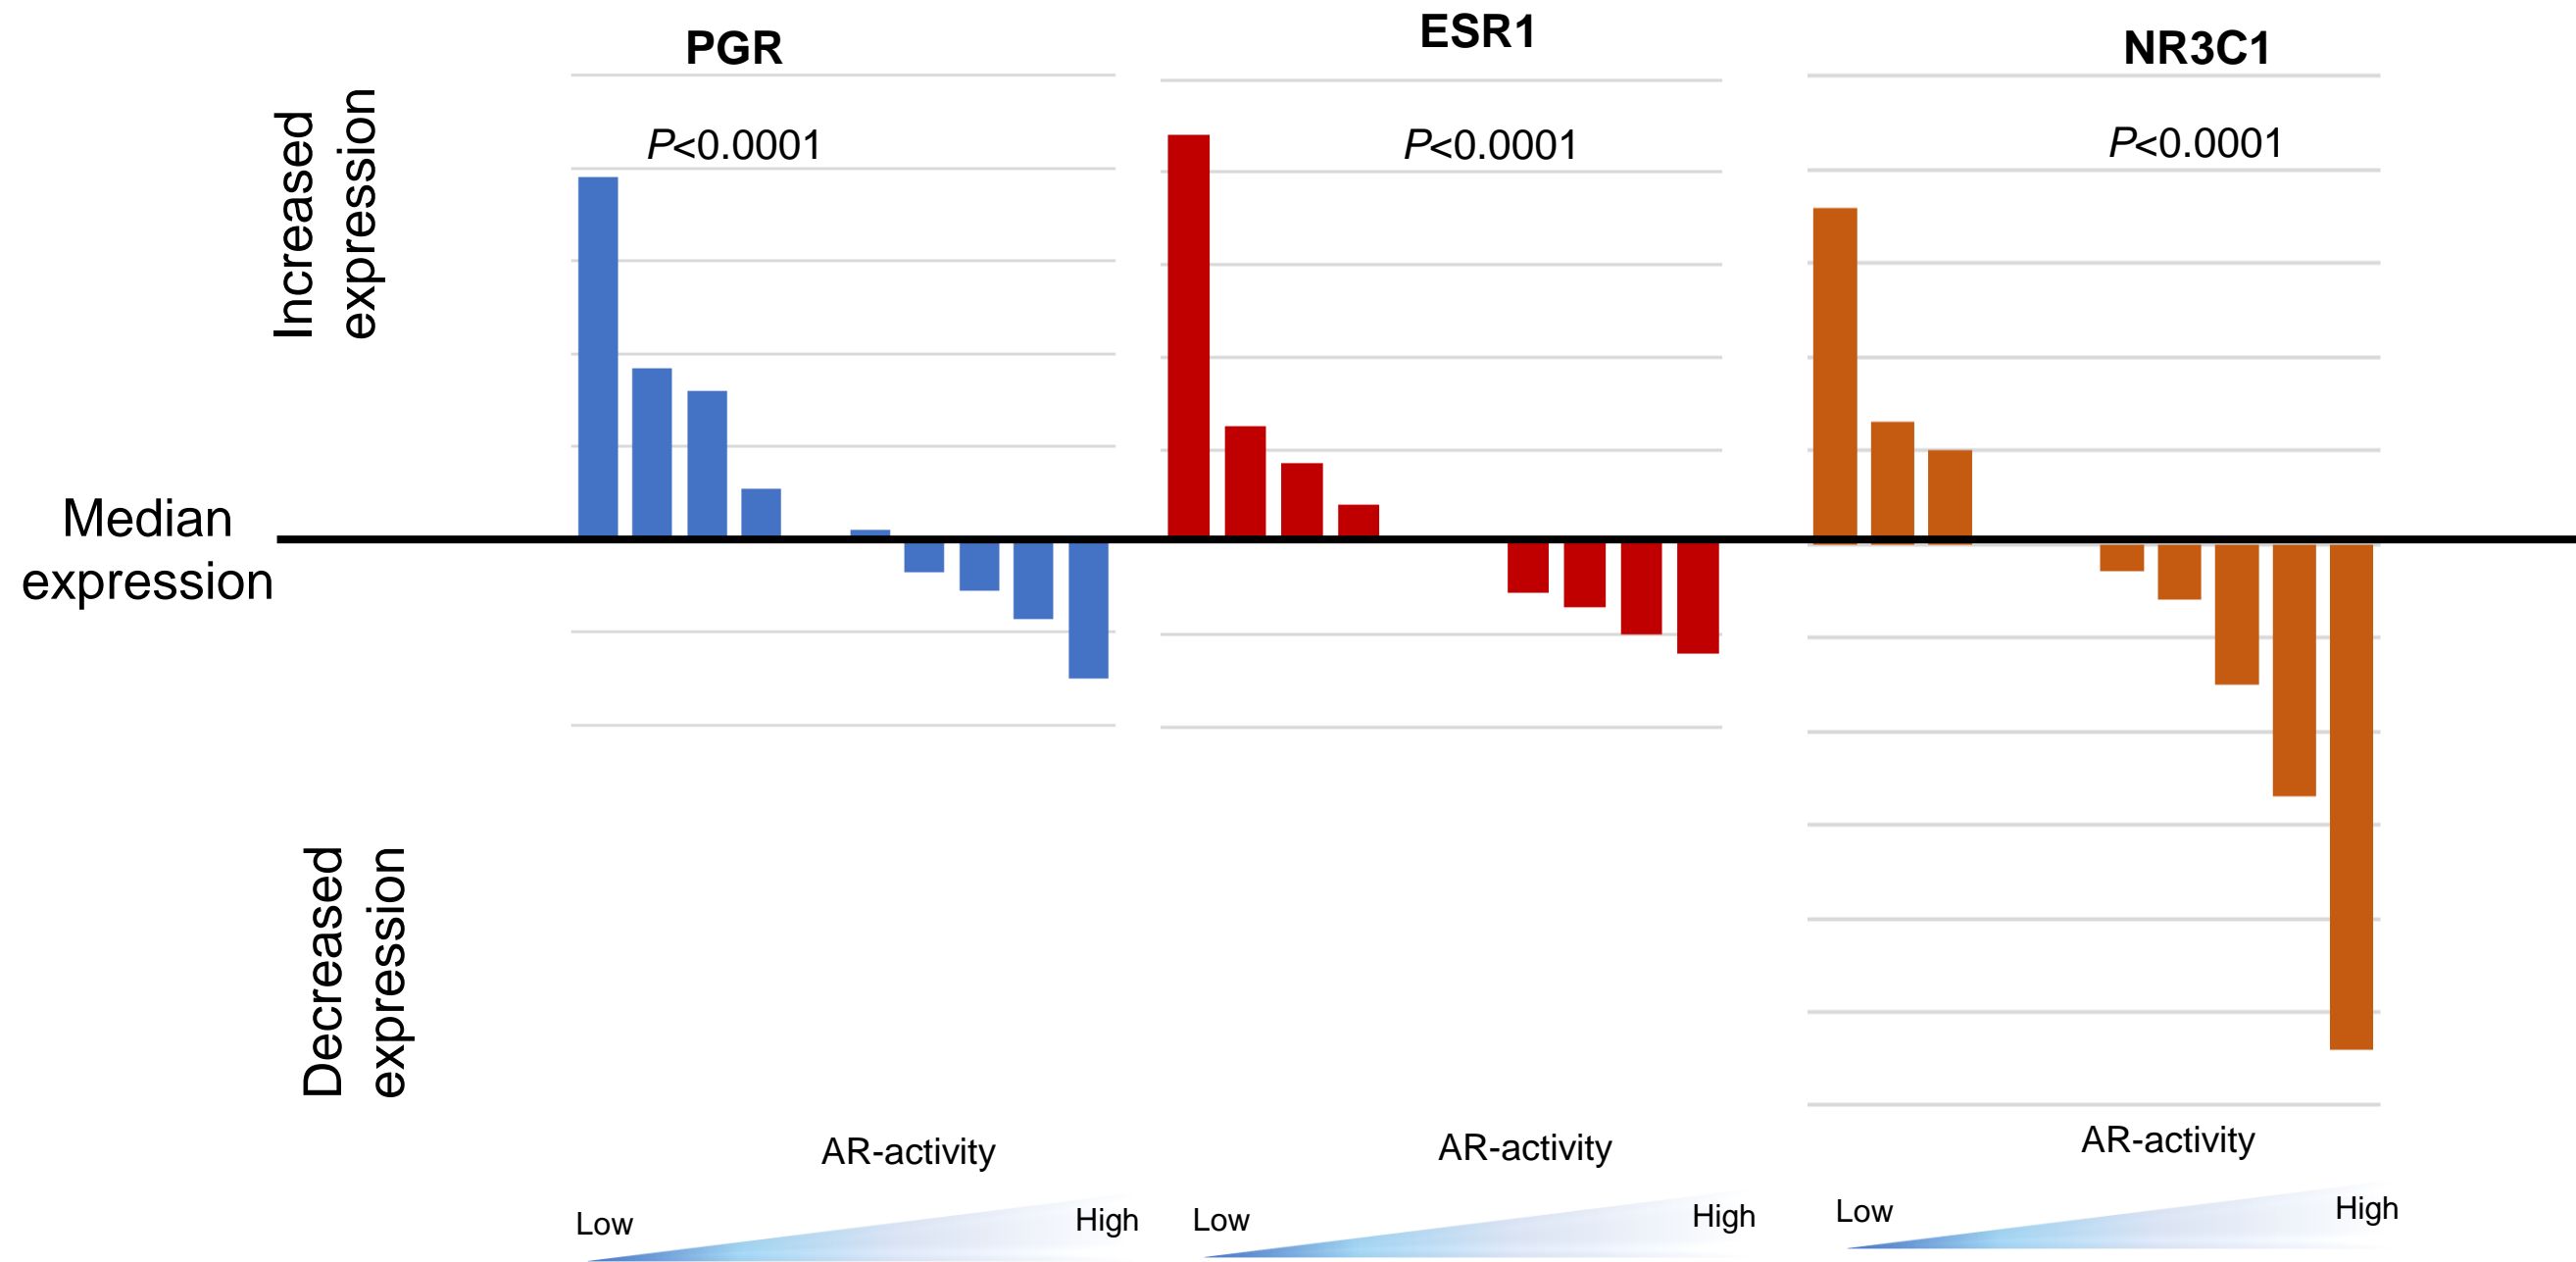

Supplementary Figure 13

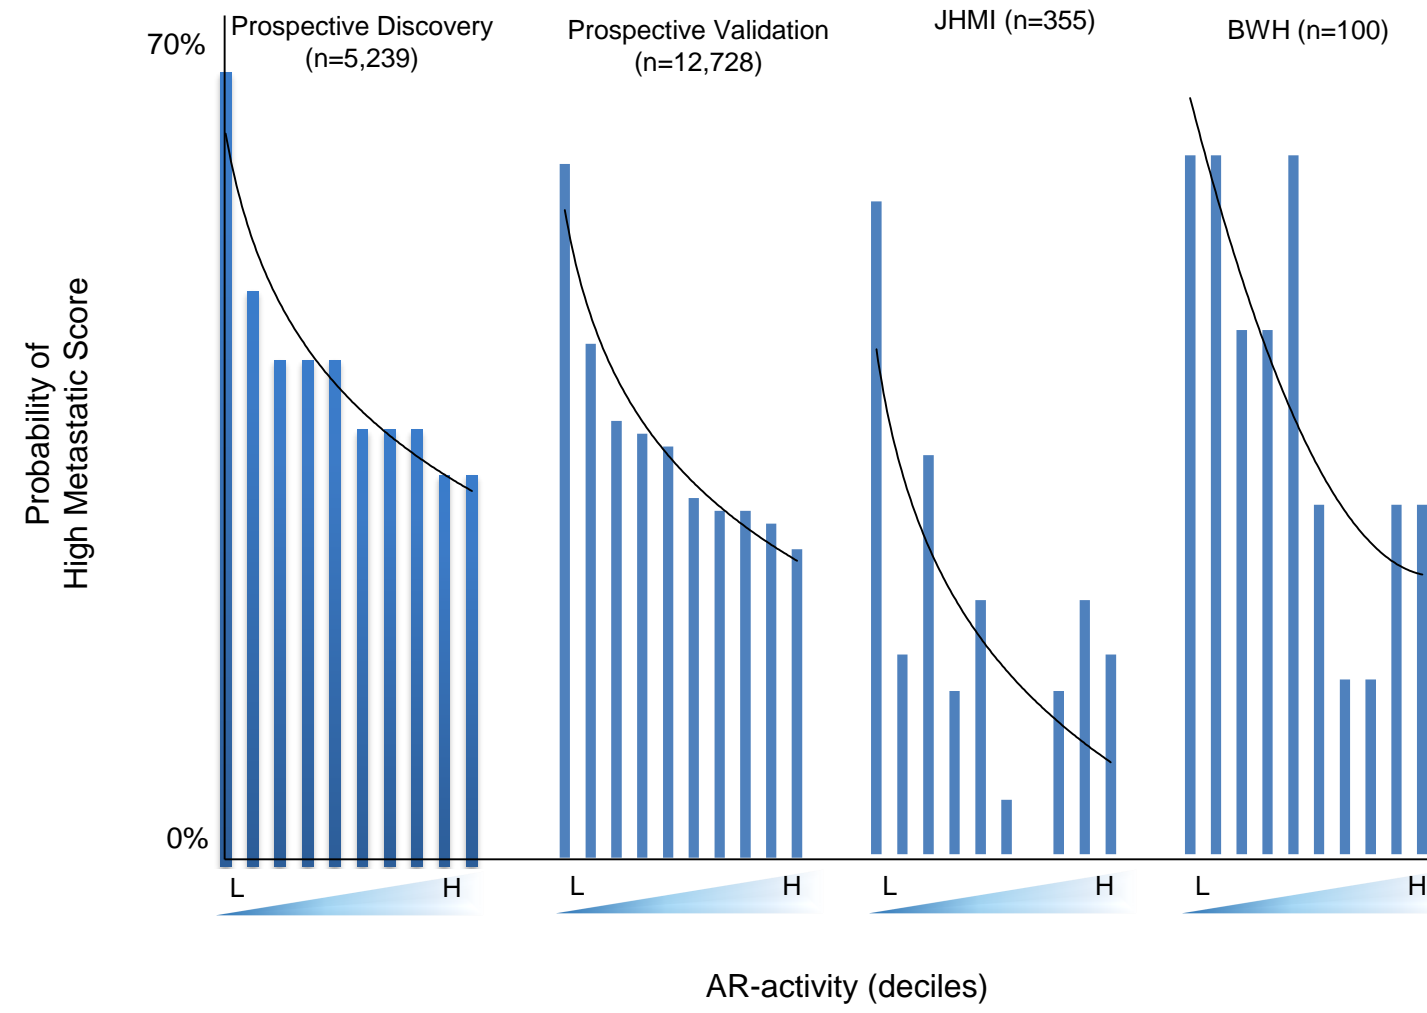

Supplementary Figure 14

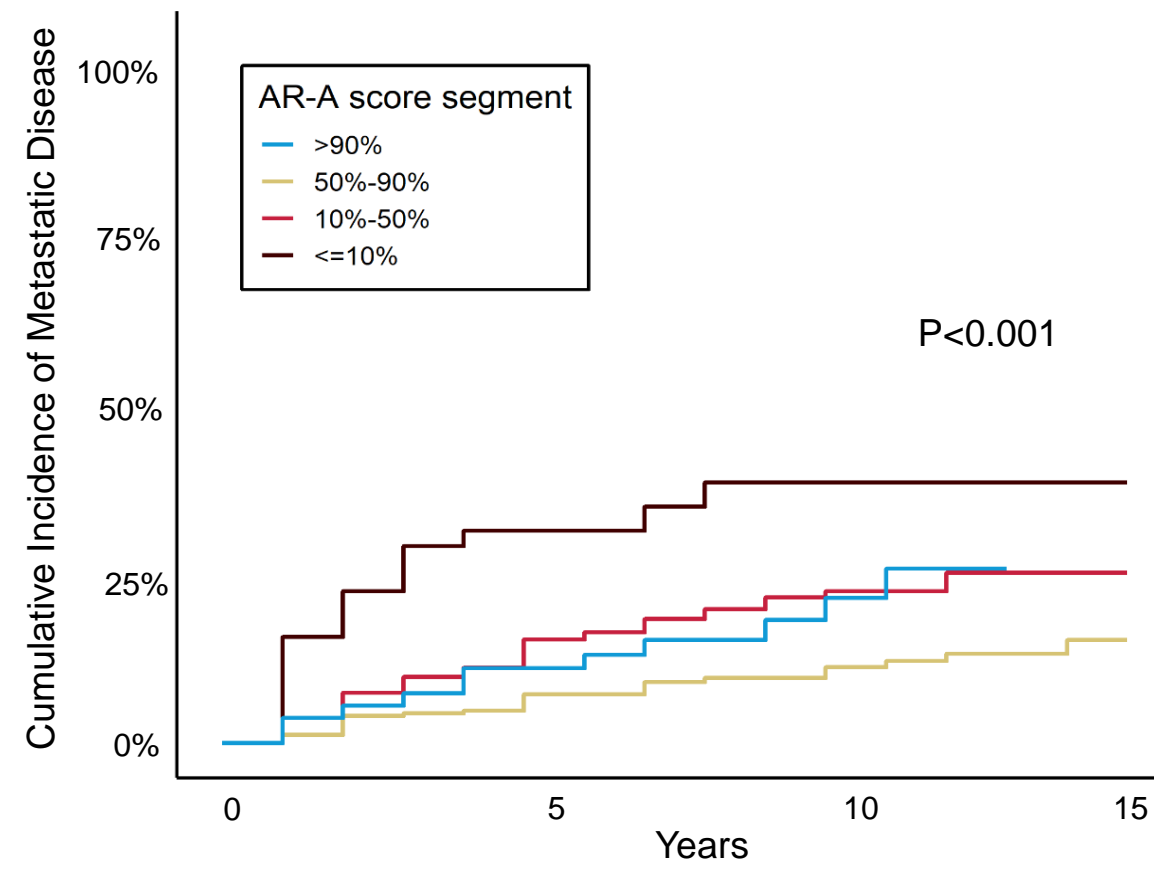

Supplementary Figure 15

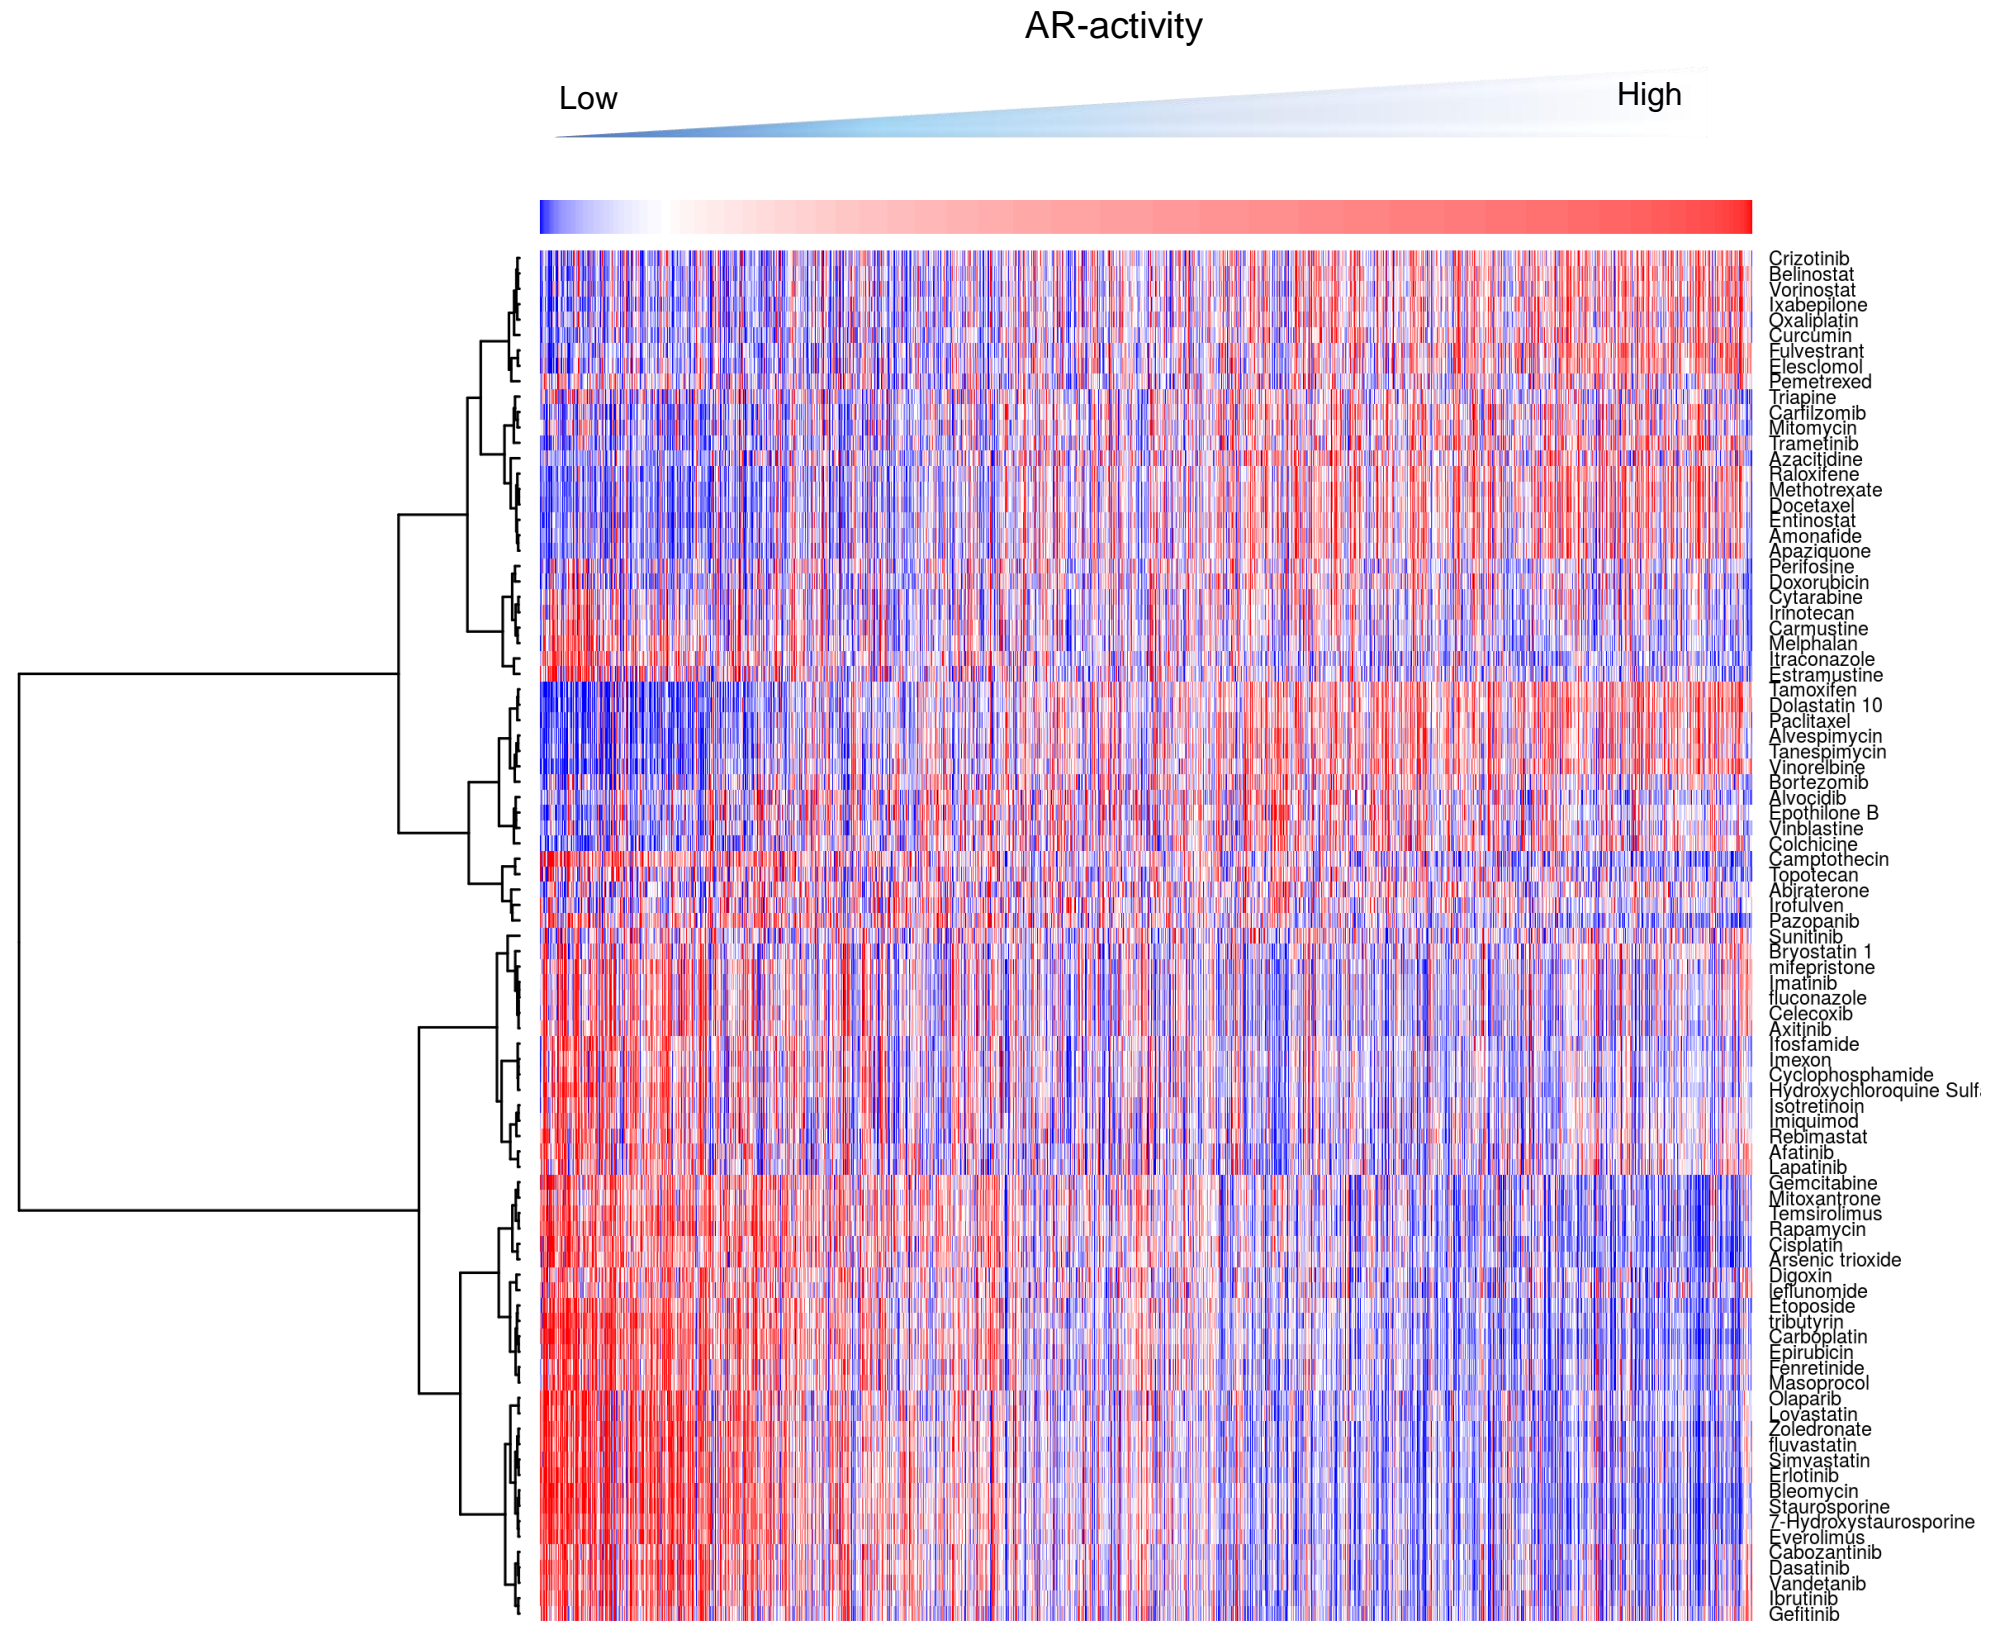



Supplementary Figure 16

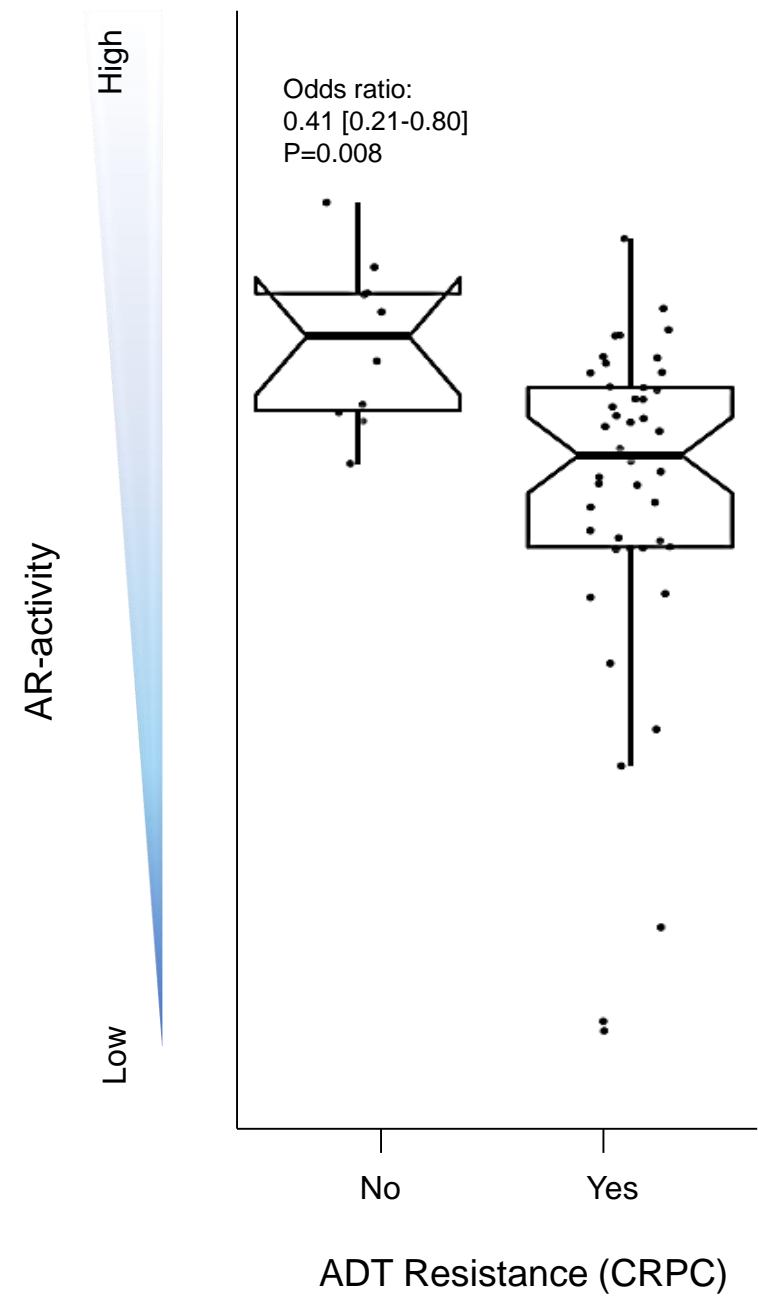

Supplementary Figure 17

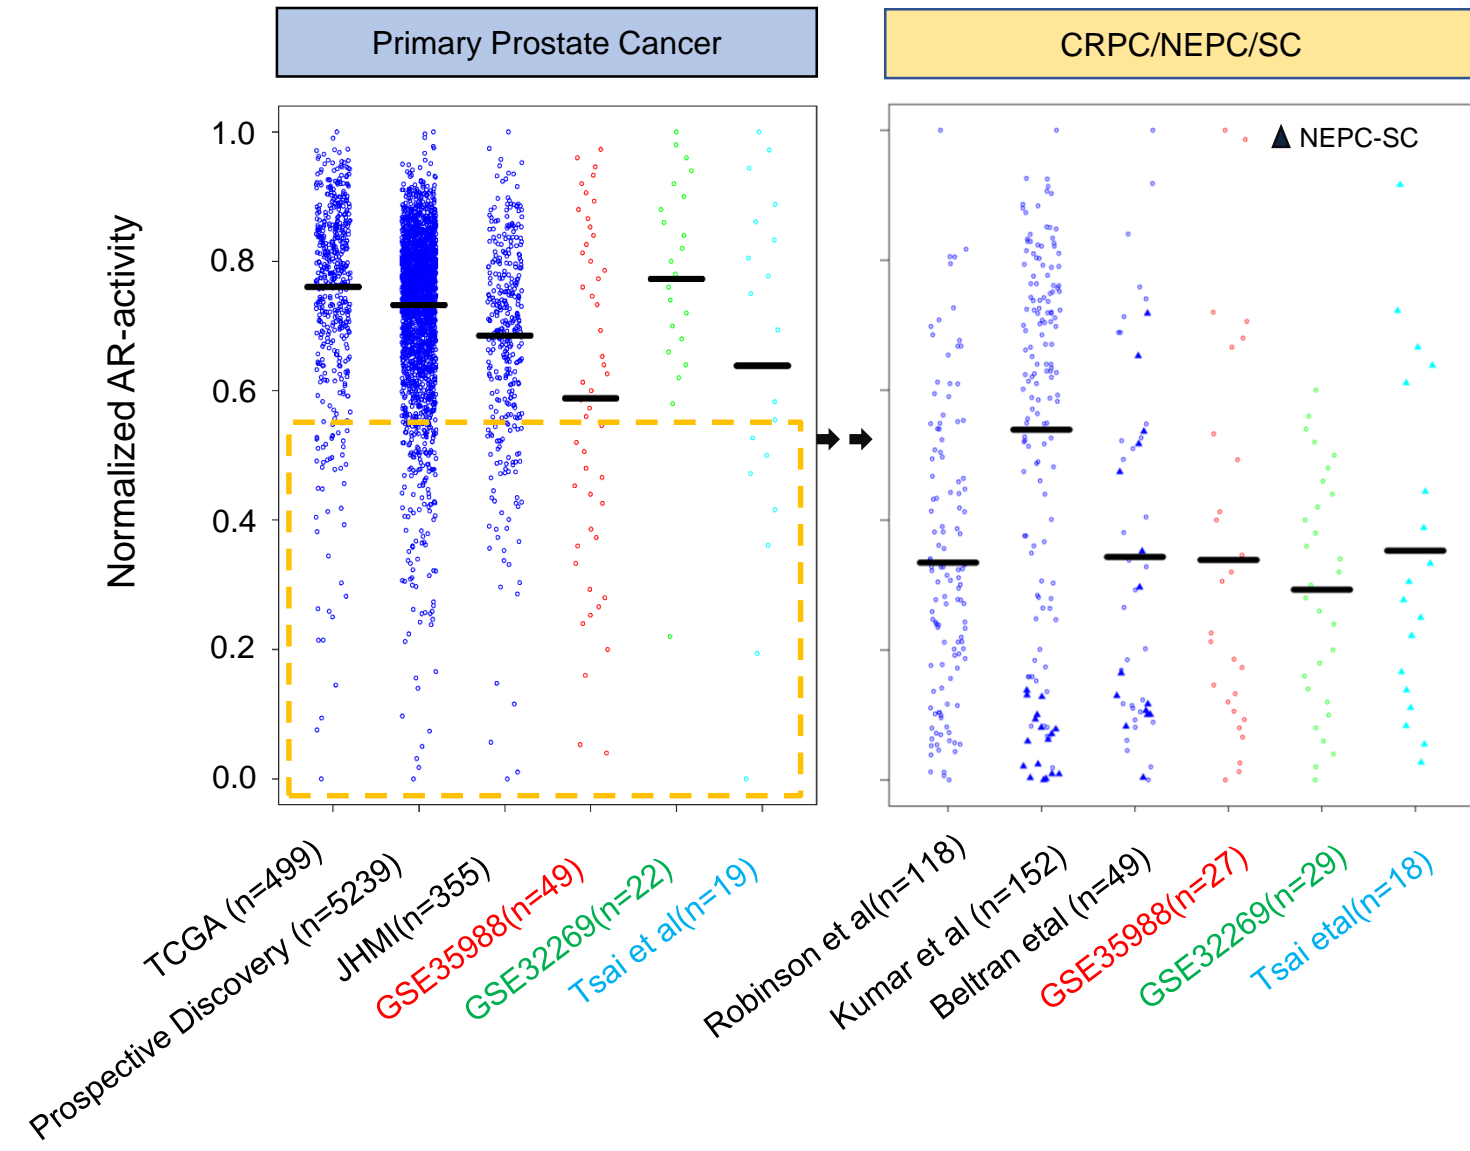

Supplementary Figure 18

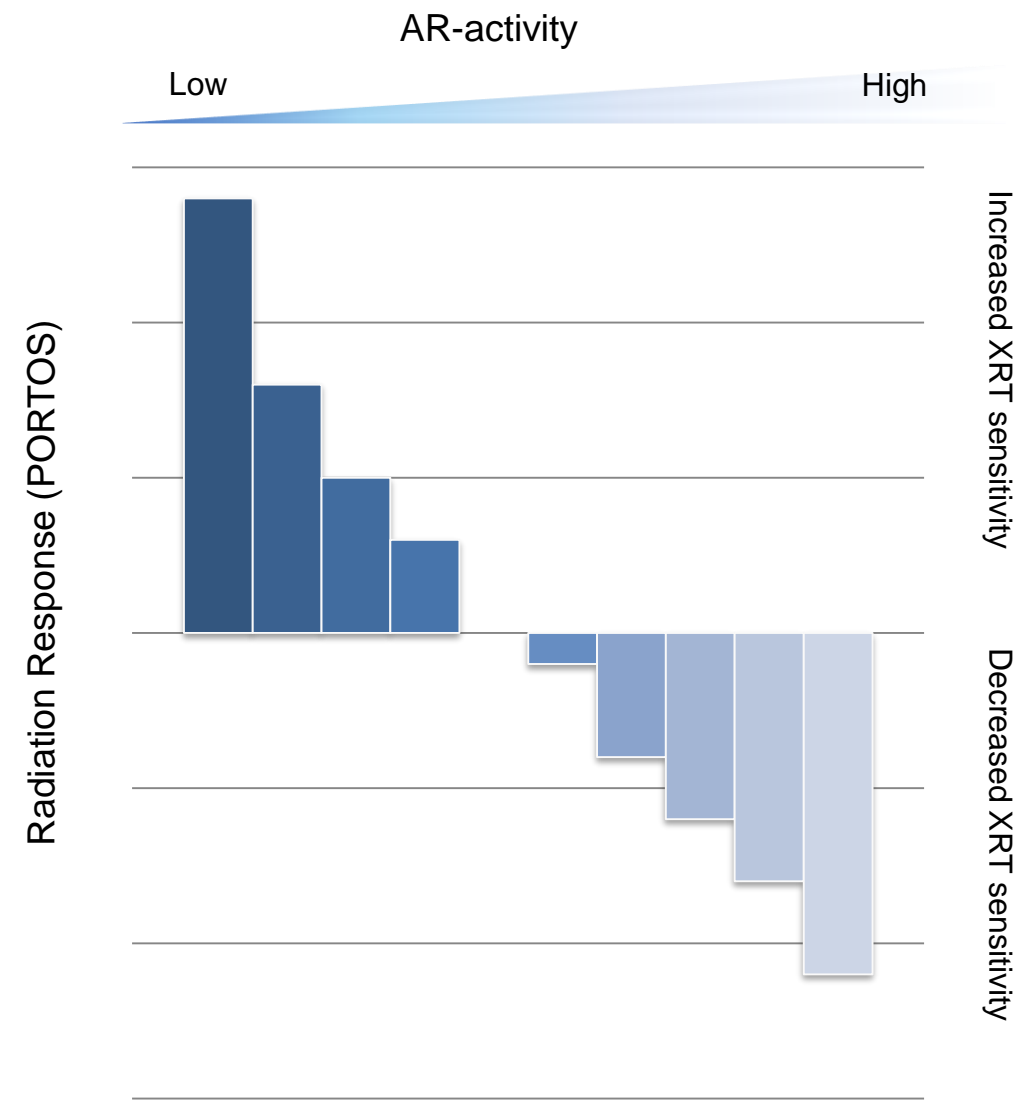

Supplement: NIHMS1539263-supplement-1.pdf [file NIHMS1539263-supplement-1.pdf]
